# Supplementary material for: Squeezing formaldehyde into C60 fullerene
Source: Springer Nature journal article supplement (doi:10.1038/s41467-024-46886-5), 2024-03-21
Supplement: MOESM1 [file 41467_2024_46886_MOESM1_ESM.pdf]

## Squeezing formaldehyde into C<sub>60</sub> fullerene.

Vijyesh K. Vyas, George R. Bacanu, Murari Soundararajan, Elizabeth S. Marsden, Tanzeeha Jafari, Anna Shugai, Mark E. Light, Urmas Nagel, Toomas Rõõm,\* Malcolm H. Levitt,\* Richard J. Whitby.\*

**Supplementary information.**

## Contents

- 1. Characterisation data and pictures of NMR's.**
  - 1.1 CH<sub>2</sub>O@2, <sup>13</sup>CH<sub>2</sub>O@2, CD<sub>2</sub>O@2
  - 1.2 CH<sub>2</sub>O@4, <sup>13</sup>CH<sub>2</sub>O@4, CD<sub>2</sub>O@4
  - 1.3 CH<sub>2</sub>O@C<sub>60</sub>, <sup>13</sup>CH<sub>2</sub>O@C<sub>60</sub>, CD<sub>2</sub>O@C<sub>60</sub>
  - 1.4 CH<sub>2</sub>O@6
  - 1.5 CO<sub>2</sub>@2
- 2. 2.1 Kinetics of loss of CH<sub>2</sub>O from CH<sub>2</sub>O@1 and CH<sub>2</sub>O@2.  
2.2 Kinetics of loss of CO<sub>2</sub> from CO<sub>2</sub>@2.**
- 3. Electrochemistry of CH<sub>2</sub>O@C<sub>60</sub>**
- 4. DFT calculations**
  - 4.1 Binding energies and activation energies for entry / exit of CH<sub>2</sub>O, H<sub>2</sub>O and CO<sub>2</sub> into **1** and **2**.
  - 4.2 Properties of CH<sub>2</sub>O@C<sub>60</sub>.
    - 4.2.1 Minimised structures of CH<sub>2</sub>O@C<sub>60</sub> and C<sub>60</sub>.
    - 4.2.2 Molecular orbital energies of CH<sub>2</sub>O@C<sub>60</sub> and C<sub>60</sub>.
    - 4.2.3 Translational modes of CH<sub>2</sub>O@C<sub>60</sub>.
    - 4.2.4 Calculation of excited state energies.
    - 4.2.5 NMR calculations on CH<sub>2</sub>O@C<sub>60</sub> and C<sub>60</sub>.
- 5. NMR studies on CH<sub>2</sub>O@C<sub>60</sub>**
  - 5.1 <sup>1</sup>H spin-lattice relaxation of <sup>13</sup>CH<sub>2</sub>O@C<sub>60</sub>.
  - 5.2 <sup>13</sup>C spin-lattice relaxation of CH<sub>2</sub>O@C<sub>60</sub>.
  - 5.3 <sup>1</sup>H spin-lattice relaxation of CH<sub>2</sub>O@2 and monomeric CH<sub>2</sub>O.
- 6. THz and IR studies on CH<sub>2</sub>O@C<sub>60</sub>.**
- 7. X-ray structure of CH<sub>2</sub>O@C<sub>60</sub> nickel(II) octaethylporphyrin complex.**
- 8. Photochemistry apparatus.**
- 9. References**

## List of Supplementary Figures and Tables.

- Supplementary Fig. 1.**  $^1\text{H}$  NMR of mixture of  $\text{CH}_2\text{O}@\mathbf{2}$  and  $\text{H}_2\text{O}@\mathbf{2} + \mathbf{2}$ .  
**Supplementary Fig. 2.**  $^{13}\text{C}$  NMR of mixture of  $\text{CH}_2\text{O}@\mathbf{2}$  and  $\text{H}_2\text{O}@\mathbf{2}$ .  
**Supplementary Fig. 3.**  $^{13}\text{C}$  NMR of  $\text{H}_2\text{O}@\mathbf{2}$ .  
**Supplementary Fig. 4.**  $^1\text{H}$  NMR of mixture of  $\text{CH}_2\text{O}@\mathbf{3}$  and  $\text{H}_2\text{O}@\mathbf{3}$ .  
**Supplementary Fig. 5.**  $^1\text{H}$  NMR of mixture of  $\text{CH}_2\text{O}@\mathbf{4}$  and  $\text{H}_2\text{O}@\mathbf{4}$  in  $\text{CDCl}_3$ .  
**Supplementary Fig. 6.**  $^1\text{H}$  NMR of mixture of  $\text{CH}_2\text{O}@\mathbf{4}$  and  $\text{H}_2\text{O}@\mathbf{4}$  in  $o\text{-C}_6\text{D}_4\text{Cl}_2\text{-}d_4$ .  
**Supplementary Fig. 7.**  $^{13}\text{C}$  NMR of  $\text{CH}_2\text{O}@\mathbf{4}$  and  $\text{H}_2\text{O}@\mathbf{4}$ .  
**Supplementary Fig. 8.**  $^1\text{H}$  NMR of mixture of  $\text{CH}_2\text{O}@\mathbf{5}$  and  $\text{H}_2\text{O}@\mathbf{5}$ .  
**Supplementary Fig. 9.**  $^1\text{H}$  NMR of  $\text{CH}_2\text{O}@\text{C}_{60}$ .  
**Supplementary Fig. 10.**  $^{13}\text{C}$  NMR of  $\text{CH}_2\text{O}@\text{C}_{60}$   
**Supplementary Fig. 11.** FT-IR comparison for  $\text{C}_{60}$  and  $\text{CH}_2\text{O}@\text{C}_{60}$   
**Supplementary Fig. 12.** UV-vis spectra of  $\text{CH}_2\text{O}@\text{C}_{60}$  and  $\text{C}_{60}$ .  
**Supplementary Fig. 13.**  $^1\text{H}$  NMR of  $\text{CH}_2\text{O}@\mathbf{6}$  and  $\text{H}_2\text{O}@\mathbf{6}$ .  
**Supplementary Fig. 14.**  $^{13}\text{C}$  NMR of  $\text{CH}_2\text{O}@\mathbf{6}$  and  $\text{H}_2\text{O}@\mathbf{6}$ .  
**Supplementary Fig. 15.**  $^1\text{H}$  NMR of  $\text{CO}_2@\mathbf{2} + \text{H}_2\text{O}@\mathbf{2}$ .  
**Supplementary Fig. 16.**  $^{13}\text{C}$  NMR of  $\text{CO}_2@\mathbf{2}$ .  
**Supplementary Fig. 17.** 1<sup>st</sup> order plots for loss of  $\text{CH}_2\text{O}$  from  $\text{CH}_2\text{O}@\mathbf{1}$  at 25 °C and 40 °C, loss of  $\text{CH}_2\text{O}$  from  $\text{CH}_2\text{O}@\mathbf{2}$  at 55 °C and loss of  $\text{CO}_2$  from  $\text{CO}_2@\mathbf{2}$  at 55 °C.  
**Supplementary Fig. 18.** Cyclic Voltammetry of  $\text{C}_{60}$  and  $\text{CH}_2\text{O}@\text{C}_{60}$ .  
**Supplementary Fig. 19.** Minimum energy conformers of  $\text{CH}_2\text{O}@\text{C}_{60}$ .  
**Supplementary Fig. 20.** HOMO and LUMO of  $\text{CH}_2\text{O}@\text{C}_{60}$  66 iso.  
**Supplementary Fig. 21.**  $^1\text{H}$   $T_1$  relaxation curves (Inversion Recovery) of  $^{13}\text{CH}_2\text{O}@\text{C}_{60}$   $^1\text{H}$  satellites  
**Supplementary Fig. 22.**  $^{13}\text{C}$   $T_1$  relaxation curve (Inversion Recovery) of  $\text{CH}_2\text{O}@\text{C}_{60}$   
**Supplementary Fig. 23.**  $^1\text{H}$   $T_1$  relaxation curve (Inversion Recovery) of  $\text{CH}_2\text{O}@\mathbf{2}$   
**Supplementary Fig. 24.**  $^1\text{H}$   $T_1$  relaxation curve (Inversion Recovery) of monomeric  $\text{CH}_2\text{O}$   
**Supplementary Fig. 25.** Comparison of transmission spectra of  $\text{CH}_2\text{O}@\text{C}_{60}$  and  $4\text{He}@\text{C}_{60}$ .  
**Supplementary Fig. 26.** Absorption spectrum of  $\text{CH}_2\text{O}@\text{C}_{60}$  at 5K and ortho-para conversion of  $\text{CH}_2\text{O}@\text{C}_{60}$  at 5K.  
**Supplementary Fig. 27.** DFT minimised position of the  $\text{CH}_2\text{O}$  in the X-ray structure of  $\text{CH}_2\text{O}@\text{C}_{60}$  nickel(II) octaethylporphyrin complex.  
**Supplementary Fig. 28.** Single crystal x-ray structure of the nickel(II) octaethylporphyrin/benzene solvate of  $\text{CH}_2\text{O}@\text{C}_{60}$   
**Supplementary Fig. 29.** Custom built photochemistry apparatus.
- Supplementary Table 1.** Loss of  $\text{CH}_2\text{O}$  from  $\text{CH}_2\text{O}@\mathbf{1}$   
**Supplementary Table 2.** Loss of  $\text{CH}_2\text{O}$  from  $\text{CH}_2\text{O}@\mathbf{2}$  at 55 °C  
**Supplementary Table 3.** Loss of  $\text{CO}_2$  from  $\text{CO}_2@\mathbf{2}$  at 55 °C  
**Supplementary Table 4.** Reduction potential of  $\text{C}_{60}$  and  $\text{CH}_2\text{O}@\text{C}_{60}$   
**Supplementary Table 5.** DFT energies for complexation in Hartree.  
**Supplementary Table 6.** Calculated free energies of binding, entry and exit of the endohedral species.  
**Supplementary Table 7.** Diameters of  $\text{CH}_2\text{O}@\text{C}_{60}$  and  $\text{C}_{60}$ .  
**Supplementary Table 8.** Calculated diameters of  $\text{CH}_2\text{O}@\text{C}_{60}$  and  $\text{C}_{60}$  cages.  
**Supplementary Table 9.** Calculated Molecular Orbital Energies of  $\text{CH}_2\text{O}@\text{C}_{60}$  and  $\text{C}_{60}$ .  
**Supplementary Table 10.** Calculated rotational and translational modes of  $\text{CH}_2\text{O}$  in  $\text{CH}_2\text{O}@\text{C}_{60}$ .  
**Supplementary Table 11.** Singlet excited state energies for  $\text{CH}_2\text{O}@\text{C}_{60}$  and  $\text{C}_{60}$ .

**Supplementary Table 12.** Calculated  $^{13}\text{C}$  NMR shifts for  $\text{C}_{60}$  and  $\text{CH}_2\text{O}@\text{C}_{60}$

**Supplementary Table 13.** Summary of  $^{13}\text{C}$  calculated Chemical shift changes on  $\text{CH}_2\text{O}$  incorporation.

## 1. Characterisation data.

$^1\text{H}$  and  $^{13}\text{C}$  NMR spectra for all compounds were recorded on Bruker AVIIIHD400 or AVIIIHD500 FT-NMR spectrometers, in the indicated solvent at 298 K.  $^1\text{H}$  chemical shifts are reported as values in ppm referenced to residual solvent ( $\text{CHCl}_3$ ,  $\delta = 7.26$  ppm,  $\text{CH}_2\text{Cl}_2$ ,  $\delta = 5.32$  ppm,  $o\text{-C}_6\text{D}_3\text{HCl}_2$ ,  $\delta = 6.93$  and  $7.19$  ppm,  $\text{C}_6\text{D}_5\text{CD}_2\text{H}$ ,  $\delta = 2.09$  ppm) and the following abbreviations are used to assign multiplicity and may be compounded: s = singlet, d = doublet, t = triplet, and m = multiplet. Coupling constants,  $J$ , are measured in Hertz (Hz).  $^{13}\text{C}$  NMR spectra were  $^1\text{H}$  decoupled except where stated and are referenced to solvents,  $o\text{-C}_6\text{D}_4\text{Cl}_2$  at  $\delta = 127.19$  ppm (centre of the 1:1:1 triplet)<sup>2</sup>,  $\text{CDCl}_3$  at  $\delta = 77.24$  ppm (centre of the triplet) and  $\text{CD}_2\text{Cl}_2 = 53.84$  ppm (central peak of pentet), toluene- $d_8$ ,  $\delta = 137.86$  ppm (downfield singlet); the solvent chemical shift is referenced to TMS ( $\delta = 0.00$  ppm).  $^2\text{H}$  NMR were taken using deuterated TMS as an external reference but were referenced to natural abundance deuterated solvent  $\text{CDCl}_3$ ,  $\delta = 7.26$  ppm,  $\text{C}_6\text{H}_5\text{CH}_2\text{D}$ ,  $\delta = 2.09$  ppm.

Negative ion electrospray mass spectra were recorded using a MaXis time of flight (TOF) mass spectrometer (Bruker Daltonik GmbH, Bremen, Germany). IR spectra of  $\text{CH}_2\text{O@C}_{60}$  and  $\text{C}_{60}$  were obtained by using a Nicolet 380 FTIR instrument with Smart orbit ATR accessory. UV measurements were recorded on an Ocean Optics DH-2000-BAL spectrometer with a 1 cm path length cell.

## 1.1 CH<sub>2</sub>O@2

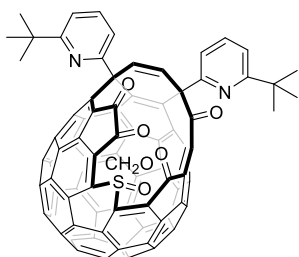

**<sup>1</sup>H NMR** (400 MHz, CD<sub>2</sub>Cl<sub>2</sub>)  $\delta$  7.649 (*t*, *J* = 7.8 Hz, 0.30H, pyridyl of H<sub>2</sub>O@2 and 2), 7.643 (*t*, *J* = 7.8 Hz, 0.70H, pyridyl of CH<sub>2</sub>O@2), 7.635 (*t*, *J* = 7.9 Hz, 0.30H, pyridyl of H<sub>2</sub>O@2 and 2), 7.628 (*t*, *J* = 7.9 Hz, 0.70H, pyridyl of CH<sub>2</sub>O@2), 7.283-7.127 (m, 5H, pyridyl and alkenyl protons, region mainly obscured by the toluene), 6.715 (d, *J* = 10.1 Hz, 0.70H, alkenyl in CH<sub>2</sub>O@2), 6.695 (d, *J* = 10.1 Hz, 0.30H, alkenyl in H<sub>2</sub>O@2 and 2), 1.191 (*s*, 2.7H, *t*-butyl for H<sub>2</sub>O@2 and 2), 1.187 (*s*, 6.3H, *t*-butyl for CH<sub>2</sub>O@2), 1.165 (*s*, 2.7H, *t*-butyl for H<sub>2</sub>O@2 and 2), 1.160 (*s*, 6.3H, *t*-butyl for CH<sub>2</sub>O@2), -1.007 (*s*, 1.4H, endohedral CH<sub>2</sub>O@2), -10.308 (br *s*, 0.5H, endohedral H<sub>2</sub>O@2).

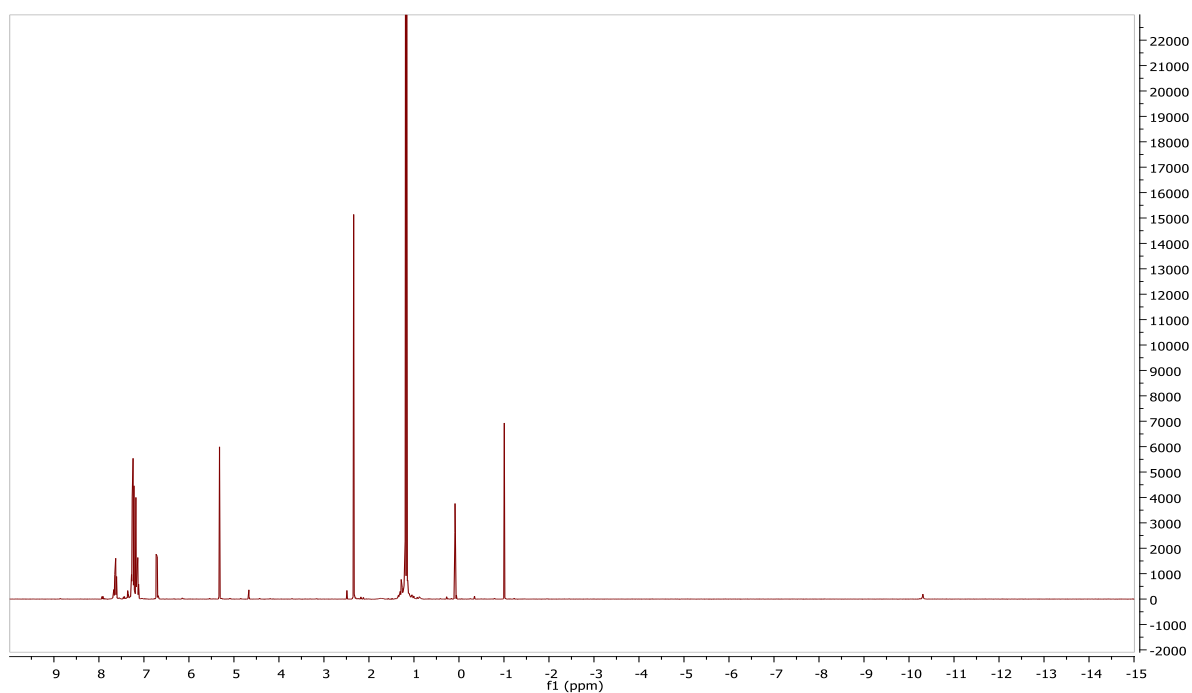

**Supplementary Fig. 1. <sup>1</sup>H NMR of mixture of CH<sub>2</sub>O@2 and H<sub>2</sub>O@2 + 2.**

**<sup>13</sup>C NMR of CH<sub>2</sub>O@2** (101 MHz, CD<sub>2</sub>Cl<sub>2</sub>)  $\delta$ c 191.86 (C), 186.23 (C), 185.77 (CH<sub>2</sub>), 184.46 (C), 181.91 (C), 169.17 (C), 168.88 (C), 163.57 (C), 162.45 (C), 156.97 (C), 156.21 (C), 151.64 (C), 151.5 (C), 151.27 (C), 151.03 (C), 150.87 (C), 150.82 (C), 150.8 (C), 150.72 (C), 150.6 (C), 150.53 (C), 150.35 (C), 149.78 (C), 149.68 (C), 148.47 (C), 148.16 (C), 147.86 (C), 147.46 (C).

(C), 145.81 (C), 145.64 (C), 145.35 (C), 144.59 (C), 144.47 (C), 144.35 (C), 144.14 (C), 143.94 (C), 143.83 (C), 143.67 (C), 143.64 (C), 143.44 (C), 142.38 (C), 141.82 (C), 141.05 (C), 140.66 (C), 139.95 (C), 139.61 (C), 139.07 (C), 138.66 (C), 138.31 (C), 138.22 (C), 138.16 (C), 138.07 (CH), 137.68 (CH), 137.6 (C), 137.31 (C), 137.07 (C), 137 (C), 136.95 (C), 136.03 (C), 135.59 (C), 133.92 (C), 133.23 (C), 132.76 (C), 131.83 (CH), 130.7 (C), 126.89 (C), 126.42 (C), 126.26 (CH), 120.52 (CH), 120.08 (CH), 118.1 (CH), 117.85 (CH), 60.14 (C), 55.3 (C), 37.98 (C), 37.93 (C), 29.97 (6xCH<sub>3</sub>). One quaternary peak not identified. The peaks for CH<sub>2</sub>O@**2** were identified by comparing with the <sup>13</sup>C spectra of H<sub>2</sub>O@**2** (below). There is a toluene impurity which could not be removed without also losing the CH<sub>2</sub>O.

**<sup>13</sup>C NMR of H<sub>2</sub>O@**2**** (101 MHz, CD<sub>2</sub>Cl<sub>2</sub>) δ<sub>c</sub> 191.71 (C), 186.21 (C), 184.23 (C), 181.81 (C), 169.16 (C), 168.88 (C), 163.44 (C), 162.35 (C), 156.65 (C), 156.14 (C), 151.48 (C), 151.14 (2 x C), 150.64 (C), 150.62 (C), 150.51 (C), 150.31 (C), 150.16 (C), 150.1 (C), 150.02 (C), 149.75 (C), 149.38 (C), 149.12 (C), 148.2 (C), 148.01 (C), 147.73 (C), 147.52 (C), 145.78 (C), 145.55 (C), 145.18 (C), 144.5 (C), 144.21 (2 x C), 144.16 (C), 143.79 (C), 143.73 (C), 143.61 (C), 143.52 (C), 143.25 (C), 142.37 (C), 141.71 (C), 141.05 (C), 140.3 (C), 139.64 (C), 139.21 (C), 138.83 (C), 138.3 (C), 138.11 (2x C), 138.07 (CH), 137.79 (C), 137.69 (CH), 137.42 (C), 137 (C), 136.82 (C), 136.74 (C), 136.48 (C), 135.05 (C), 134.62 (C), 133.5 (C), 133.02 (C), 132.39 (C), 131.76 (CH), 130.64 (C), 126.45 (C), 126.21 (CH), 120.48 (CH), 120.05 (CH), 118.12 (CH), 117.85 (CH), 60.03 (C), 55.14 (C), 37.96 (C), 37.9 (C), 29.96 (6 x CH<sub>3</sub>). 4 quaternary peaks not observed. Many of the peaks are broadened by equilibrium with empty sulfoxide occurring on the NMR timescale. Approximately 10% empty **2** is present but peaks not reported.

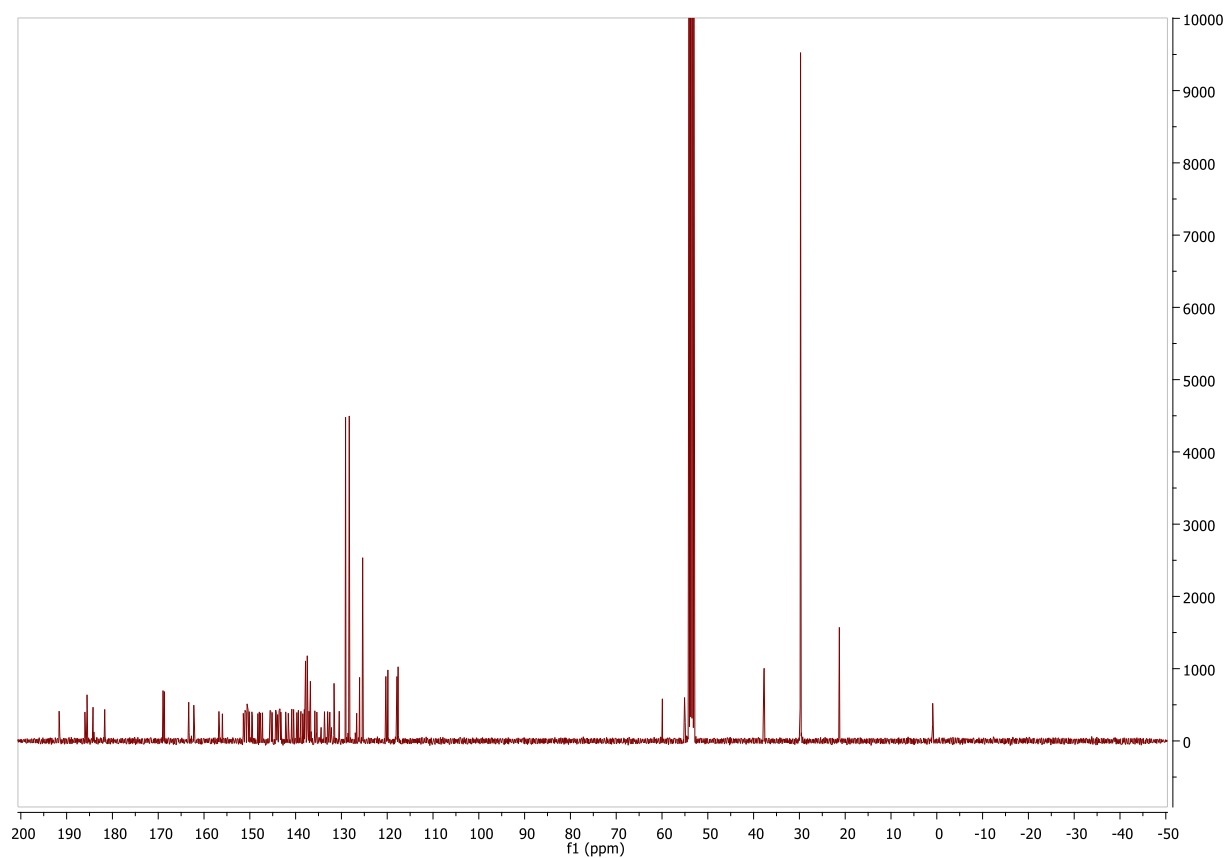

**Supplementary Fig. 2.**  $^{13}\text{C}$  NMR of mixture of  $\text{CH}_2\text{O@2}$  and  $\text{H}_2\text{O@2}$ .

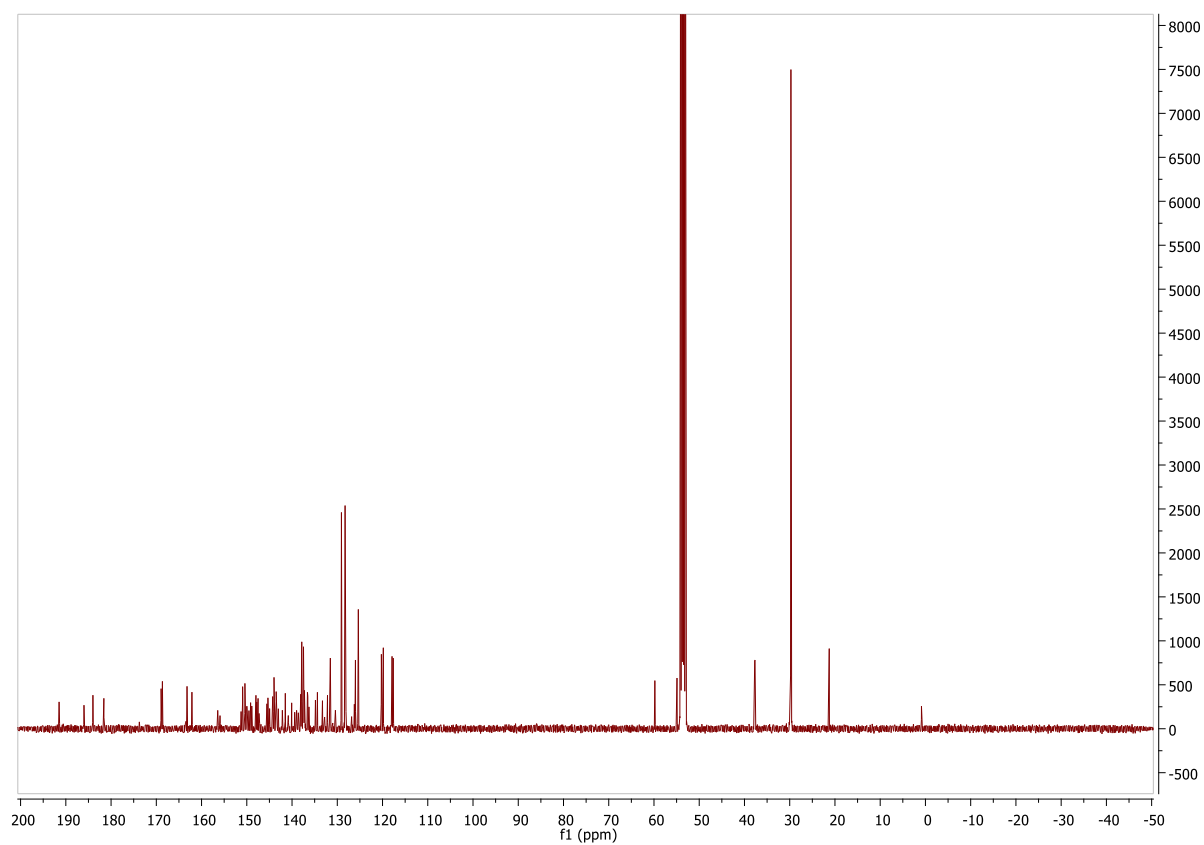

**Supplementary Fig. 3.**  $^{13}\text{C}$  NMR of  $\text{H}_2\text{O@2}$ .



**HRMS (ESI+)** ( $m/z$ ): Calculated for  $[C_{83}H_{29}N_2O_6S]^+$  1181.1741, found 1181.1731 ( $CH_2O$  filled). Calculated for  $[C_{82}H_{27}N_2O_5S]^+$  1151.1635, found 1151.1628 (empty).

**$^{13}CH_2O@2$**

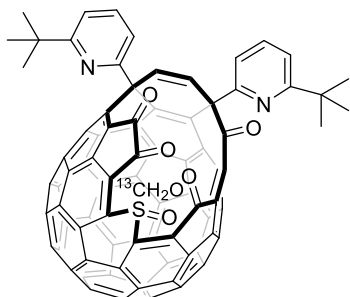

The mixture of  $^{13}CH_2O@2$  and  $H_2O@2$  and **2** with  $CH_2O$  filling of 24%.

**$^1H$  NMR** (400 MHz,  $CDCl_3$ )  $\delta$  7.619 (t,  $J = 7.8$  Hz, 0.76H, pyridyl of  $H_2O@2$  and **2**), 7.613 (t,  $J = 7.8$  Hz, 0.24H, pyridyl of  $CH_2O@2$ ), 7.602 (t,  $J = 7.9$  Hz, 0.76H, pyridyl of  $H_2O@2$  and **2**), 7.595 (t,  $J = 7.9$  Hz, 0.24H, pyridyl of  $CH_2O@2$ ), 7.282-7.130 (m, 5H, pyridyl and alkenyl protons, region mainly obscured by the toluene), 6.751 (d,  $J = 10.3$  Hz, 0.24H, alkenyl in  $CH_2O@2$ ), 6.766 (d,  $J = 10.3$  Hz, 0.76H, alkenyl in  $H_2O@2$  and **2**), 1.179 (s, 6.8H, *t*-butyl for  $H_2O@2$  and **2**), 1.175 (s, 2.2H, *t*-butyl for  $CH_2O@2$ ), 1.139 (s, 6.8H, *t*-butyl for  $H_2O@2$  and **2**), 1.135 (s, 2.2H, *t*-butyl for  $CH_2O@2$ ), -0.903 (d,  $J = 174.2$  Hz, 0.48H, endohedral  $CH_2O@2$ ), -10.280 (br s, 1.3H, endohedral  $H_2O@2$ ).

**$^{13}C$  NMR** (101 MHz,  $CDCl_3$ , proton decoupled)  $\delta$ c 185.70 ppm (endohedral  $^{13}CH_2O$ ).

**HRMS (ESI+)** ( $m/z$ ): Calculated for  $[^{13}CC_{82}H_{29}N_2O_6S]^+$  1182.1774, found 1182.1791 ( $^{13}CH_2O@2$ ). Calculated for  $[C_{82}H_{27}N_2O_5S]^+$  1151.1635, found 1151.1656 (empty **2**).

**$CD_2O@2$**

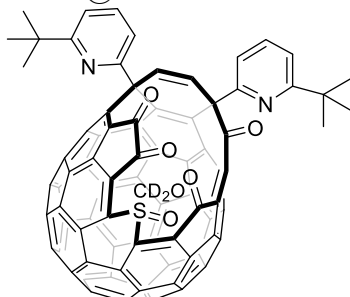

The mixture of  $CD_2O@2$  and  $H_2O@2$  + **2** with a ratio of 25:75

**$^2H$  NMR** (77 MHz,  $CHCl_3$ )  $\delta$  -0.848 ppm.

**HRMS (ESI+)** ( $m/z$ ): Calculated for  $[\text{C}_{83}\text{H}_{27}\text{D}_2\text{N}_2\text{O}_6\text{S}]^+$  1183.1866, found 1183.1791 ( $\text{CD}_2\text{O@2}$ ). Calculated for  $[\text{C}_{82}\text{H}_{27}\text{N}_2\text{O}_5\text{S}]^+$  1151.1635, found 1151.1646 (empty **2**). Calculated for  $[\text{C}_{82}\text{H}_{29}\text{N}_2\text{O}_6\text{S}]^+$  1169.1741, found 1169.1734 ( $\text{H}_2\text{O@2}$ ).

## 1.2 $\text{CH}_2\text{O@4}$

Intermediate  $\text{CH}_2\text{O@3}$  (31 : 69 mixture with  $\text{H}_2\text{O@3}$ ).

$^1\text{H}$  NMR (400 MHz,  $\text{CDCl}_3$ )  $\delta$  7.639 (t,  $J = 7.9$  Hz, 0.31H, pyridyl of  $\text{H}_2\text{O@3}$ ), 7.631 (t,  $J = 7.9$  Hz, 0.69H, pyridyl of  $\text{H}_2\text{O@3}$ ), 7.563 (t,  $J = 7.8$  Hz, 0.69H, pyridyl of  $\text{H}_2\text{O@3}$ ), 7.557 (t,  $J = 7.8$  Hz, 0.31H, pyridyl of  $\text{CH}_2\text{O@3}$ ), 7.479 (dd,  $J = 7.8, 0.8$  Hz, 0.31H, pyridyl of  $\text{CH}_2\text{O@3}$ ), 7.468 (dd,  $J = 7.8, 0.8$  Hz, 0.69H, pyridyl of  $\text{H}_2\text{O@3}$ ), 7.285 – 7.155 (m, 3H, pyridyl protons, region mainly obscured by the toluene), 7.137 (d,  $J = 10.1$  Hz, 0.31H, alkenyl in  $\text{CH}_2\text{O@3}$ ), 7.102 (d,  $J = 10.1$  Hz, 0.69H, alkenyl in  $\text{H}_2\text{O@3}$ ), 7.032 (d,  $J = 10.1$  Hz, 0.31H, alkenyl in  $\text{CH}_2\text{O@3}$ ), 6.997 (d,  $J = 10.1$  Hz, 0.69H, alkenyl in  $\text{H}_2\text{O@3}$ ), 1.234 (s, 2.8H, *t*-butyl for  $\text{CH}_2\text{O@3}$ ), 1.227 (s, 6.2H, *t*-butyl for  $\text{H}_2\text{O@3}$ ), 1.168 (s, 6.2H, *t*-butyl for  $\text{H}_2\text{O@3}$ ), 1.163 (s, 2.8H, *t*-butyl for  $\text{CH}_2\text{O@3}$ ), -0.009 (s, 0.62H, endohedral  $\text{CH}_2\text{O@3}$ ), -9.852 (s, 1.30H, endohedral  $\text{H}_2\text{O@3}$ ).

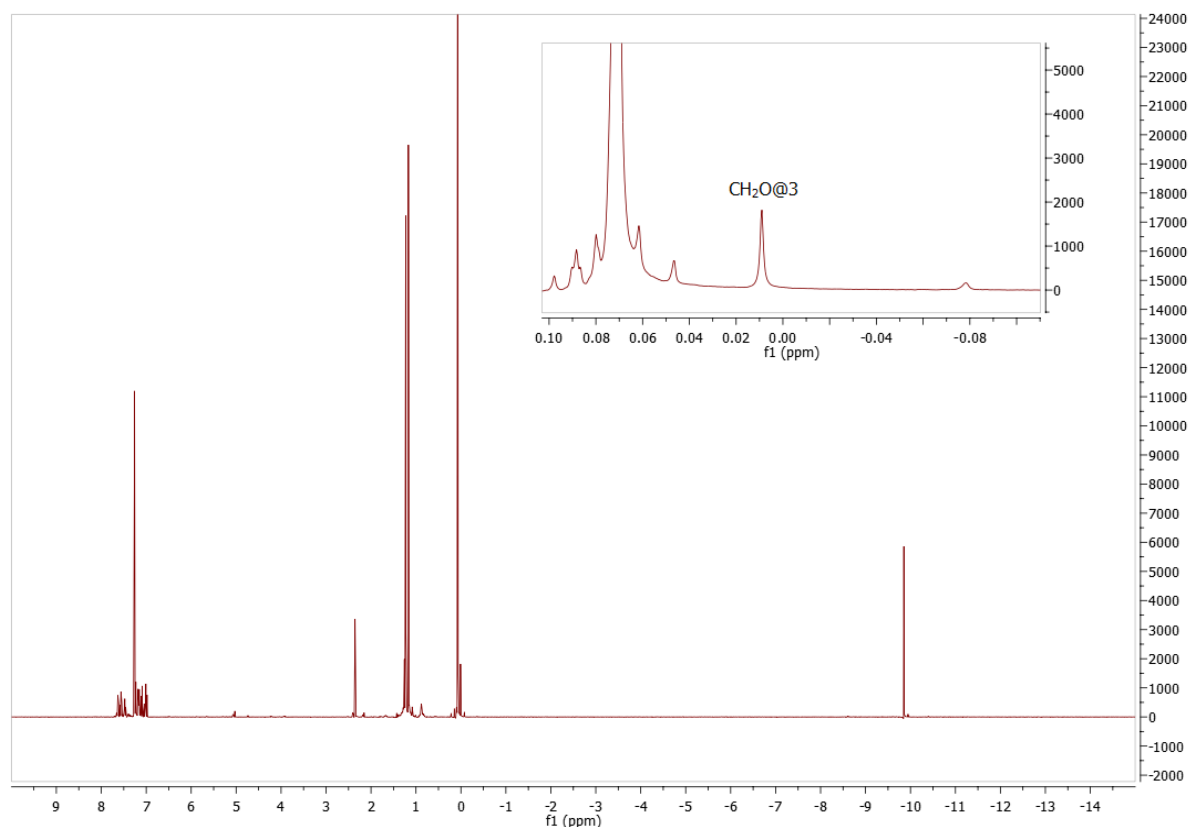

**Supplementary Fig. 4.**  $^1\text{H}$  NMR of mixture of  $\text{CH}_2\text{O@3}$  and  $\text{H}_2\text{O@3}$ .

$\text{CH}_2\text{O@4}$  (mixture with  $\text{H}_2\text{O@4}$  with a ratio of 35:65. (<5% empty **4** also present but could not be quantified)).

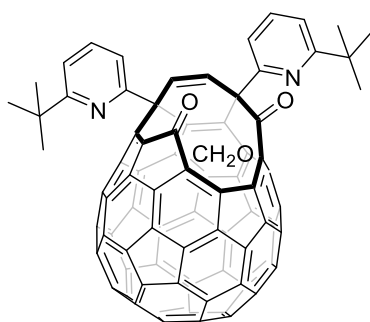

$^1\text{H}$  NMR (400 MHz,  $\text{CDCl}_3$ )  $\delta$  7.697 (t,  $J = 7.8$  Hz, 0.35H, pyridyl for  $\text{CH}_2\text{O@4}$ ), 7.685 (t,  $J = 7.8$  Hz, 0.65H, pyridyl for  $\text{H}_2\text{O@4}$ ), 7.657 (t,  $J = 7.8$  Hz, 1H, pyridyl for  $\text{CH}_2\text{O@4} + \text{H}_2\text{O@4}$ ), 7.531 (dd,  $J = 7.8$  Hz, 0.8 Hz, 0.35H, pyridyl for  $\text{CH}_2\text{O@4}$ ), 7.512 (dd,  $J = 7.8$  Hz, 0.8 Hz, 0.65H, pyridyl for  $\text{H}_2\text{O@4}$ ), 7.387 (dd,  $J = 7.8$  Hz, 0.8 Hz, 0.35H, pyridyl for  $\text{CH}_2\text{O@4}$ ), 7.385 (dd,  $J = 7.8$  Hz, 0.8 Hz, 0.65H, pyridyl for  $\text{H}_2\text{O@4}$ ), 7.242 (d,  $J = 10.0$  Hz, 0.35H, alkenyl for  $\text{CH}_2\text{O@4}$ ), 7.231 (dd,  $J = 7.8$  Hz, 0.8 Hz, 2H, pyridyl for  $\text{CH}_2\text{O@4} + \text{H}_2\text{O@4}$ ), 7.224 (d,  $J = 10.0$  Hz, 0.65H, alkenyl for  $\text{H}_2\text{O@4}$ ), 7.222 (d,  $J = 10.0$  Hz, 0.35H, alkenyl for  $\text{CH}_2\text{O@4}$ ),

7.171 (d,  $J = 10.0$  Hz, 0.65H, alkenyl for H<sub>2</sub>O@4), 1.263 (s, 5.8H, *t*-butyl of H<sub>2</sub>O@4), 1.260 (s, 3.2H, *t*-butyl of CH<sub>2</sub>O@4), 1.187 (s, 3.2H, *t*-butyl of CH<sub>2</sub>O@4), 1.176 (s, 5.8H, *t*-butyl of H<sub>2</sub>O@4 and 4), 0.803 (s, 0.70H, endohedral CH<sub>2</sub>O@4), -8.797 (s, 1.14H, endohedral H<sub>2</sub>O@4).

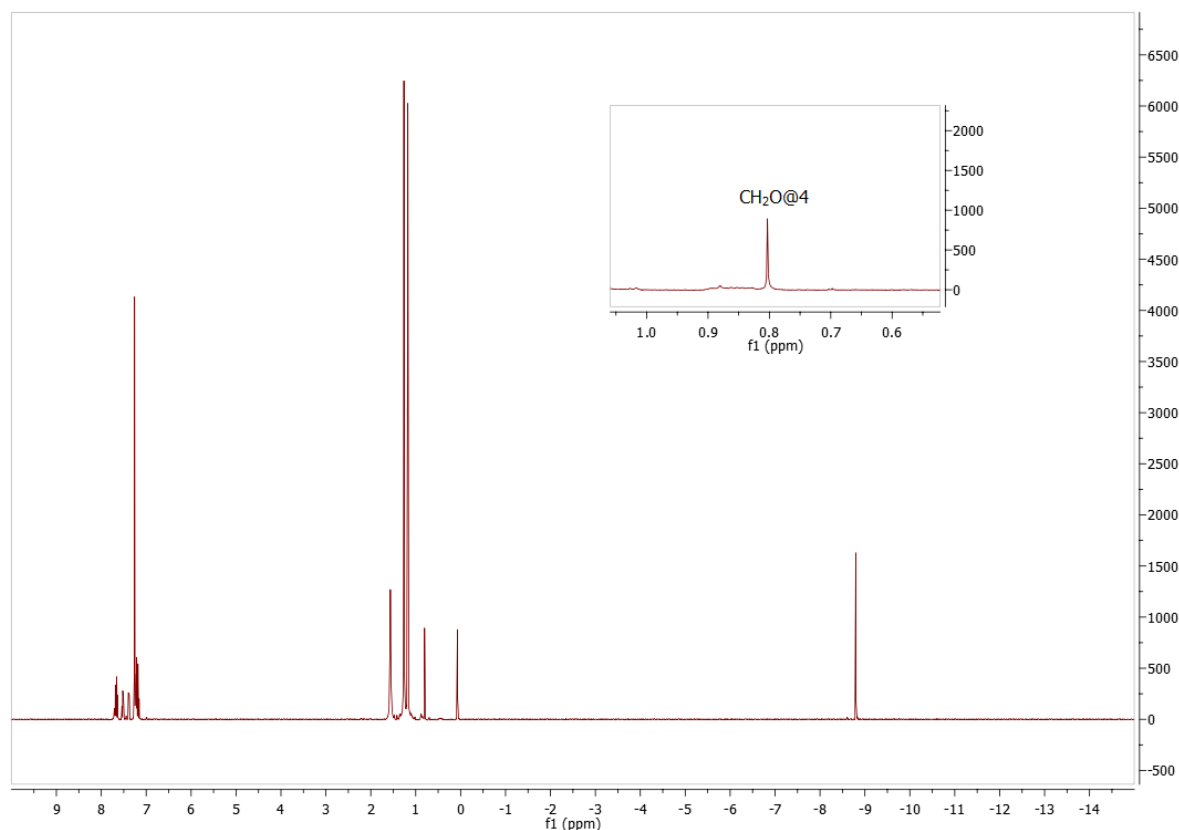

**Supplementary Fig. 5.** <sup>1</sup>H NMR of mixture of CH<sub>2</sub>O@4 and H<sub>2</sub>O@4 in CDCl<sub>3</sub>.

<sup>1</sup>H NMR (400 MHz, *o*-C<sub>6</sub>D<sub>4</sub>Cl<sub>2</sub>-*d*<sub>4</sub>)  $\delta$  7.536 (t,  $J = 7.8$  Hz, 0.35H, pyridyl for CH<sub>2</sub>O@4), 7.522 (t,  $J = 7.8$  Hz, 0.65H, pyridyl for H<sub>2</sub>O@4), 7.520 -7.460 (m, 2H, pyridyl for CH<sub>2</sub>O@4 and H<sub>2</sub>O@4), 7.378 (dd,  $J = 7.8, 0.8$  Hz, 0.35H, pyridyl for CH<sub>2</sub>O@4), 7.377 (dd,  $J = 7.8, 0.8$  Hz, 0.65H, pyridyl for H<sub>2</sub>O@4), 7.245 (d,  $J = 10.0$  Hz, 0.35H, alkenyl for CH<sub>2</sub>O@4), 7.227 (d,  $J = 10.0$  Hz, 0.65H, alkenyl for H<sub>2</sub>O@4), 7.105 – 7.005 (m, 2H, pyridyl of CH<sub>2</sub>O@4 and H<sub>2</sub>O@4), 1.271 (s, 5.9H, *t*-butyl for H<sub>2</sub>O@4), 1.268 (s, 3.1H, *t*-butyl for CH<sub>2</sub>O@2), 1.173 (s, 3.1H, *t*-butyl for CH<sub>2</sub>O@4), 1.163 (s, 5.9H, *t*-butyl for H<sub>2</sub>O@4), 0.661 (s, 0.70H, CH<sub>2</sub>O@4), -8.947 (s, 1.2H, H<sub>2</sub>O@4).

One alkenyl proton is obscured by solvent.

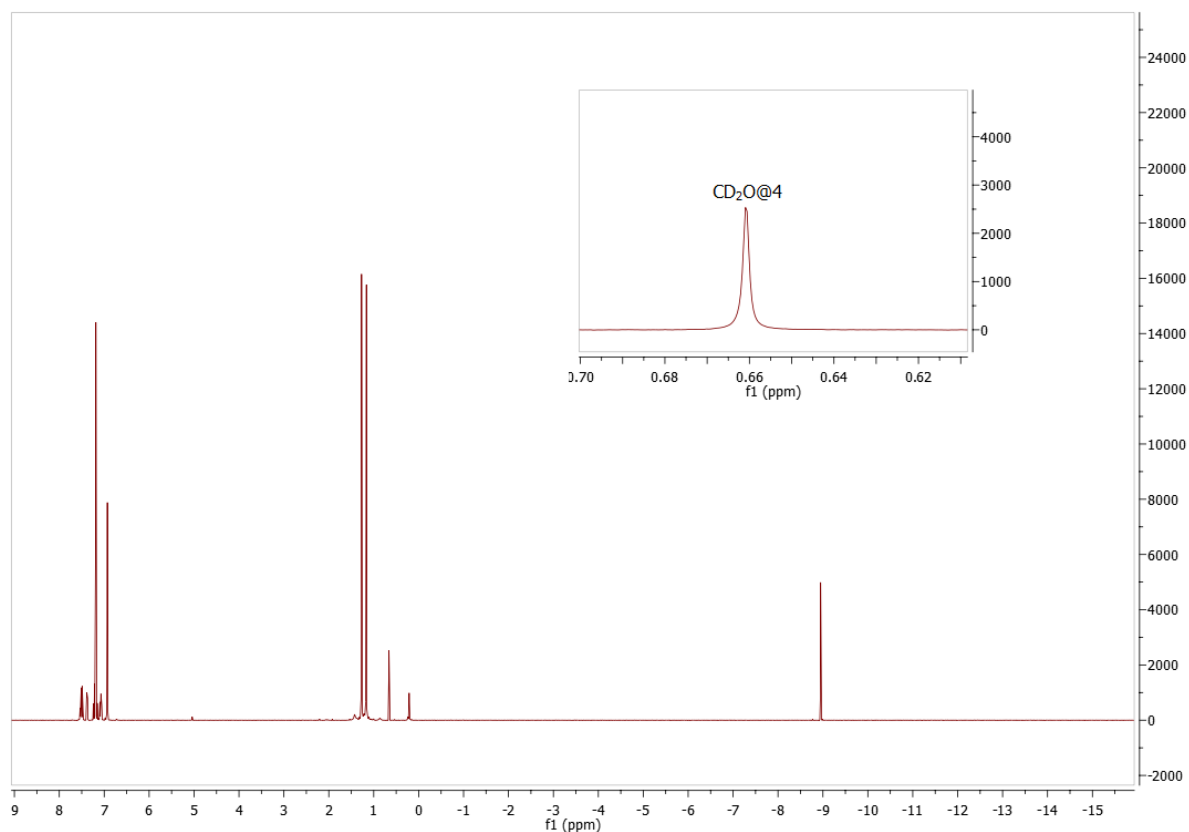

**Supplementary Fig. 6.**  $^1\text{H}$  NMR of mixture of  $\text{CH}_2\text{O@4}$  and  $\text{H}_2\text{O@4}$  in  $o\text{-C}_6\text{D}_4\text{Cl}_2\text{-}d_4$ .

**$\text{CH}_2\text{O@4} + \text{H}_2\text{O@4}$   $^{13}\text{C}$  NMR (101 MHz,  $o\text{-C}_6\text{D}_4\text{Cl}_2$ ):** 199.17 (C), 199.02\* (C), 191.47 (C), 190.19\* ( $\text{CH}_2$ ), 168.97\* (C), 168.92 (C), 168.64\* (C), 168.62 (C), 165.52\* (C), 165.44 (C), 162.45\* (C), 162.44 (C), 154.60 (C), 151.16\* (C), 150.09 (C), 149.55\* (C), 148.77 (C), 148.75\* (C), 148.67\* (C), 148.64\* (C), 148.46\* (C), 147.87 (C), 147.77 (C), 147.66 (C), 147.39 (C), 146.98\* (C), 146.67\* (C), 146.65\* (C), 146.56\* (C), 146.52 (C), 146.51 (C), 146.43\* (C), 146.35 (C), 146.25 (C), 146.23\* (C), 146.21 (C), 146.11\* (C), 146.07 (C), 145.94\* (C), 145.92\* (C), 145.90\* (C), 145.88\* (C), 145.75 (C), 145.74\* (C), 145.67 (C), 145.64\* (C), 145.63 (C), 145.59 (C), 145.58 (C), 145.47 (C), 145.45 (C), 145.38 (C), 145.01 (C), 144.84\* (C), 144.77\* (C), 144.62 (C), 144.60 (C), 144.52 (C), 144.18 (C), 143.86 (C), 143.81 (C), 143.72\* (C), 142.77\* (C), 142.65 (C), 142.60 (C), 142.08 (C), 141.93\* (C), 141.92 (C), 141.87\* (C), 141.81 (C), 141.72\* (C), 141.65\* (C), 141.60 (C), 141.51\* (C), 140.99\* (C), 140.77 (C), 140.44 (C), 140.40\* (C), 140.29 (C), 140.26 (C), 140.17 (C), 140.08 (C), 140.05\* (C), 139.90\* (C), 139.86\* (C), 139.82\* (C), 139.60\* (C), 139.56 (C), 139.47 (C), 139.39 (C), 139.38 (C), 139.15\* (C), 139.04\* (C), 138.76\* (C), 138.61 (C), 138.44 (C), 138.33 (C), 138.08\* (C), 137.58 (C), 137.45\* (CH), 137.41 (CH), 137.36 (C), 137.25\* (CH), 137.23 (CH), 136.49\* (C), 136.48 (C), 136.13\* (C), 135.94 (C), 135.76\* (C), 135.72 (C), 135.40\* (C),

134.88 (C), 134.31\* (C), 133.73 (C), 133.27\* (C), 132.75 (C), 132.70\* (CH), 132.63 (CH), 132.57 (C), 132.19 (C), 131.49\* (C), 131.11 (C), 130.01 CH<sub>a</sub>, 129.93\* CH<sup>a</sup>, 120.20\* (CH), 120.18 (CH), 119.83\* (CH), 119.79 (CH), 117.60\* (CH), 117.55 (CH), 116.84 (CH), 61.20\* (C), 61.15 (C), 55.09\* (C), 54.89 (C), 37.70\* (C), 37.68 (C), 37.59 (C), 29.94 (CH<sub>3</sub>), 29.92 (CH<sub>3</sub>). \* signals from CH<sub>2</sub>O@4 identified from size and comparison with spectra of pure H<sub>2</sub>O@4. <sup>a</sup> – from DEPT135 spectra (obscured by *o*-C<sub>6</sub>D<sub>4</sub>Cl<sub>2</sub>-*d*<sub>4</sub> peaks in normal spectra).

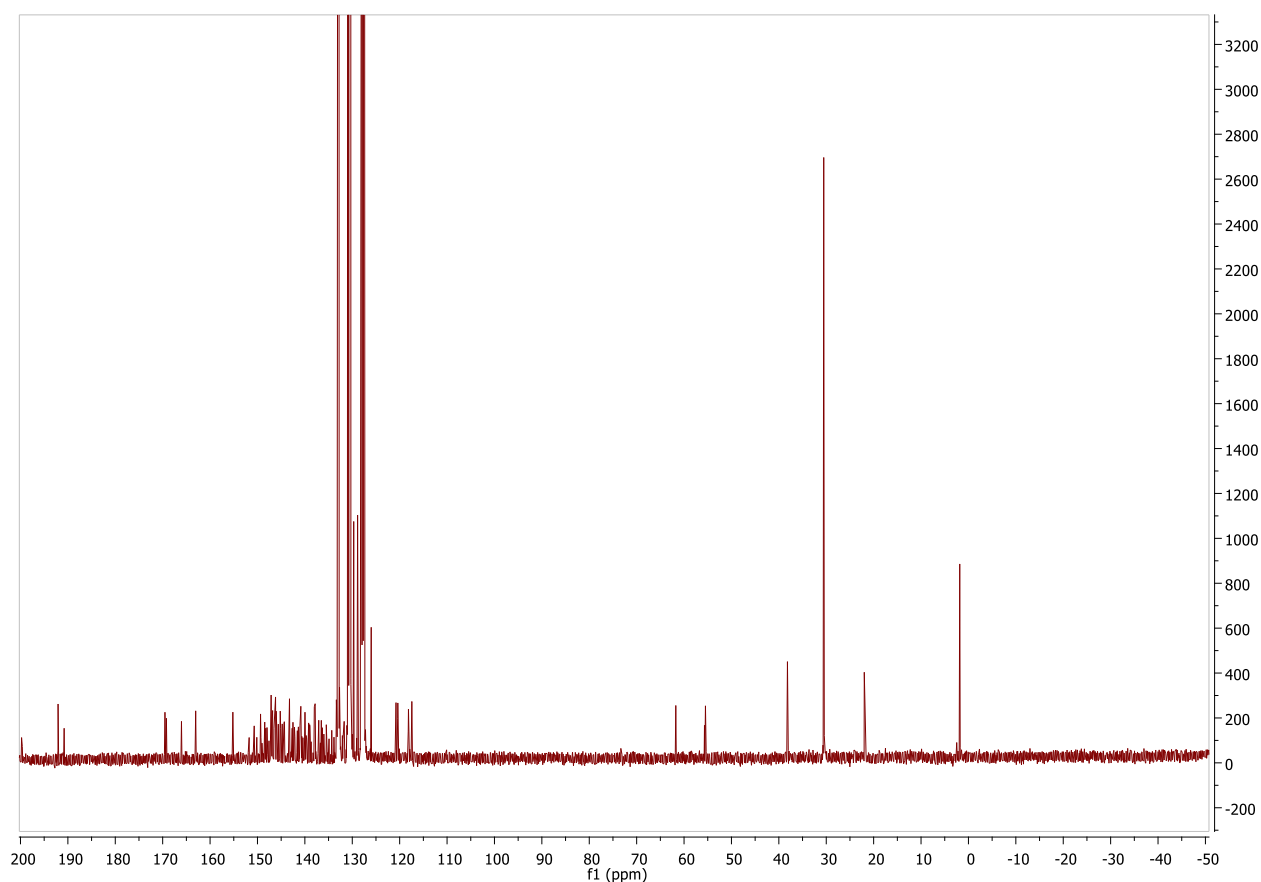

**Supplementary Fig. 7. <sup>13</sup>C NMR of CH<sub>2</sub>O@4 and H<sub>2</sub>O@4.**

**HRMS (ESI+)** (*m/z*): Calculated for [C<sub>83</sub>H<sub>29</sub>N<sub>2</sub>O<sub>3</sub>]<sup>+</sup> 1101.2173, found 1101.2163 (CH<sub>2</sub>O@4). Calculated for [C<sub>82</sub>H<sub>27</sub>N<sub>2</sub>O<sub>2</sub>]<sup>+</sup> 1071.2067, found 1071.2056 (empty 4). Calculated for [C<sub>82</sub>H<sub>29</sub>N<sub>2</sub>O<sub>3</sub>]<sup>+</sup> 1089.2173, found 1089.2168 (H<sub>2</sub>O@4).

### $^{13}\text{CH}_2\text{O}@4$

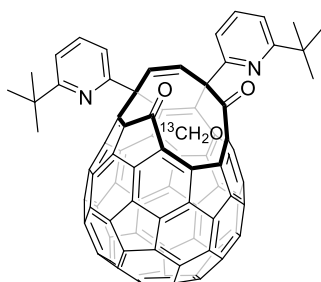

Obtained as mixture of  $^{13}\text{CH}_2\text{O}@4$  and  $\text{H}_2\text{O}@4$  with 8% filling of  $\text{CH}_2\text{O}$  (with a small amount of empty **4** also present).

$^{13}\text{C}$  NMR (101 MHz,  $\text{CDCl}_3$ , without proton decoupling)  $\delta$  190.47 (t,  $J = 175.0$  Hz,  $^{13}\text{CH}_2\text{O}@4$ ).

**HRMS (ESI+)** ( $m/z$ ): Calculated for  $[^{13}\text{CC}_82\text{H}_{29}\text{N}_2\text{O}_3]^+$  1102.2206, found 1102.2177 ( $^{13}\text{CH}_2\text{O}@4$ ). Calculated for  $[\text{C}_{82}\text{H}_{27}\text{N}_2\text{O}_2]^+$  1071.2067, found 1071.2037 (empty **4**). Calculated for  $[\text{C}_{82}\text{H}_{29}\text{N}_2\text{O}_3]^+$  1089.2173, found 1089.2149 ( $\text{H}_2\text{O}@4$ ).

### $\text{CD}_2\text{O}@4$

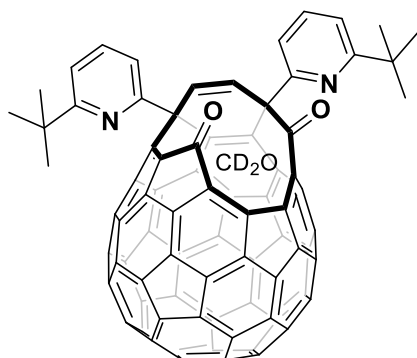

Obtained as a mixture of  $\text{CD}_2\text{O}@4$  and  $\text{H}_2\text{O}@4$  with 7%  $\text{CH}_2\text{O}$  filling (with a small amount of empty **4** also present)

**HRMS (ESI+)** ( $m/z$ ): Calculated for  $[\text{C}_{83}\text{H}_{27}\text{D}_2\text{N}_2\text{O}_3]^+$  1103.2298, found 1103.2271 ( $\text{CD}_2\text{O}@4$ ). Calculated for  $[\text{C}_{82}\text{H}_{27}\text{N}_2\text{O}_2]^+$  1071.2067, found 1071.2052 (empty **4**). Calculated for  $[\text{C}_{82}\text{H}_{29}\text{N}_2\text{O}_3]^+$  1089.2173, found 1089.2158 ( $\text{H}_2\text{O}@4$ ).

### 1.3 $\text{CH}_2\text{O}@C_{60}$

Intermediate  $\text{CH}_2\text{O}@5$  and  $\text{H}_2\text{O}@5$  with a ratio of 22:78. ~ 5% empty **5** also present but could not be measured (signals very close to  $\text{H}_2\text{O}@5$ ).

$^1\text{H}$  NMR (400 MHz,  $\text{CDCl}_3$ )  $\delta$  7.783 (t,  $J = 7.7$  Hz, 0.46H, pyridyl of  $\text{CH}_2\text{O@5}$ ), 7.777 (t,  $J = 7.7$  Hz, 1.54H, pyridyl  $\text{H}_2\text{O@5}$ ), 7.725 (dd,  $J = 7.7$ , 0.9 Hz, 0.46H, pyridyl of  $\text{CH}_2\text{O@5}$ ), 7.715 (dd,  $J = 7.7$ , 0.9 Hz, 1.54H, pyridyl  $\text{H}_2\text{O@5}$ ), 7.326 (dd,  $J = 7.7$ , 0.9 Hz, 0.46H, pyridyl of  $\text{CH}_2\text{O@5}$ ), 7.325 (dd,  $J = 7.7$ , 0.9 Hz, 1.54H, pyridyl of  $\text{H}_2\text{O@5}$ ), 6.503 (s, 0.46H, alkenyl of  $\text{CH}_2\text{O@5}$ ), 6.467 (s, 0.1.54H, alkenyl of  $\text{H}_2\text{O@5}$ ), 2.922 (s, 0.46H, endohedral  $\text{CH}_2\text{O@5}$ ), 1.359 (s, 18H, *t*-butyl of  $\text{CH}_2\text{O@5}$  +  $\text{H}_2\text{O@5}$ ), -6.086 (s, 1.43H, endohedral  $\text{H}_2\text{O@5}$ ).

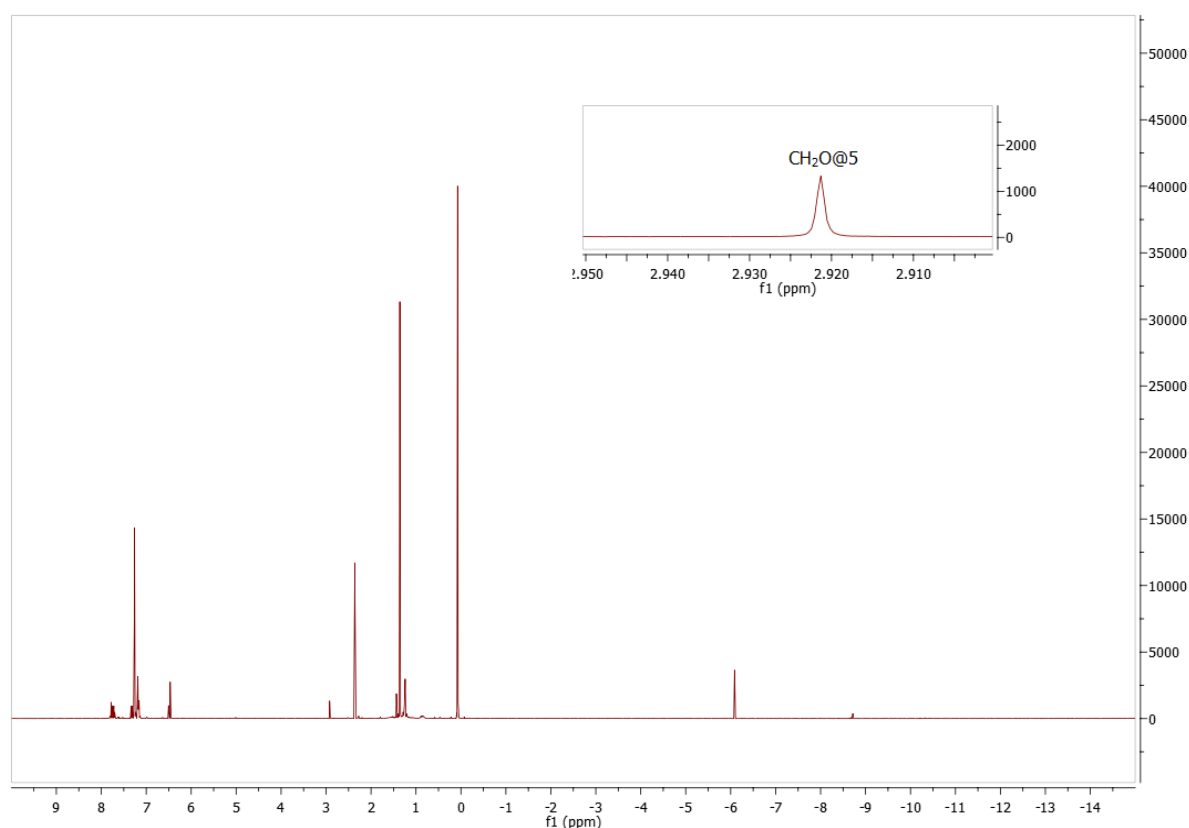

**Supplementary Fig. 8.**  $^1\text{H}$  NMR of mixture of  $\text{CH}_2\text{O@5}$  and  $\text{H}_2\text{O@5}$ .

**$\text{CH}_2\text{O@C}_{60}$ .**

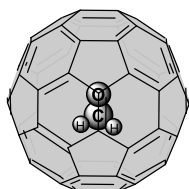

$^1\text{H}$  NMR (400 MHz, toluene- $d_8$ )  $\delta$  3.804 ppm ( $\text{H}_2\text{CO@C}_{60}$ ).

$^{13}\text{C}$  NMR (100 MHz, toluene- $d_8$ )  $\delta$  144.25 ( $\text{CH}_2\text{O@C}_{60}$ ) ( $\text{CH}_2\text{O}$  carbon not visible)



**$^{13}\text{C}$  NMR** (176 MHz, *o*- $\text{C}_6\text{D}_4\text{Cl}_2$ -*d*<sub>4</sub>)  $\delta$  197.23 (t,  $J$  = 173.4 Hz, endohedral  $\text{CH}_2\text{O}$ ), 143.49 ( $\text{CH}_2\text{O}@\text{C}_{60}$ ).

**UV** (toluene):  $\lambda_{\text{max}}$  409 nm,  $\epsilon$  2344  $\text{M}^{-1} \text{cm}^{-1}$ .  $\lambda_{\text{max}}$  550 nm,  $\epsilon$  609  $\text{M}^{-1} \text{cm}^{-1}$ .  $\lambda_{\text{max}}$  602 nm,  $\epsilon$  544  $\text{M}^{-1} \text{cm}^{-1}$ .  $\lambda_{\text{max}}$  631 nm,  $\epsilon$  276  $\text{M}^{-1} \text{cm}^{-1}$ .

**HRMS (ESI)** ( $m/z$ ): Calculated for  $[\text{C}_{61}\text{H}_2\text{O}]^+$  750.0111, found 750.0103.

**IR.**  $\nu_{\text{max}}$  2916 (CH stretch of endohedral  $\text{CH}_2\text{O}$ ), 1717 (CO stretch of endohedral  $\text{CH}_2\text{O}$ ), 1420, 1177, 575  $\text{cm}^{-1}$ . For comparison  $\text{C}_{60}$   $\nu_{\text{max}}$  1420, 1177, 575  $\text{cm}^{-1}$  (See Supplementary Fig. 11)

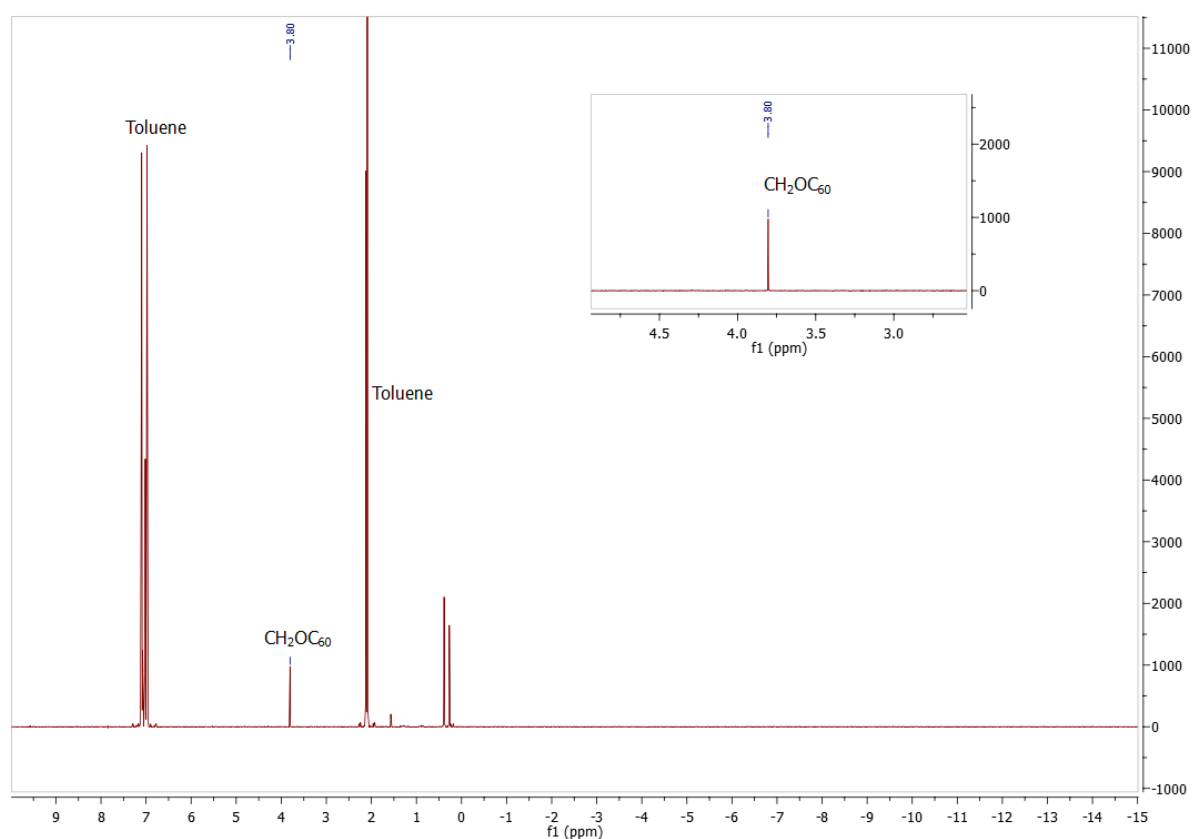

**Supplementary Fig. 9.**  $^1\text{H}$  NMR of  $\text{CH}_2\text{O}@\text{C}_{60}$ .

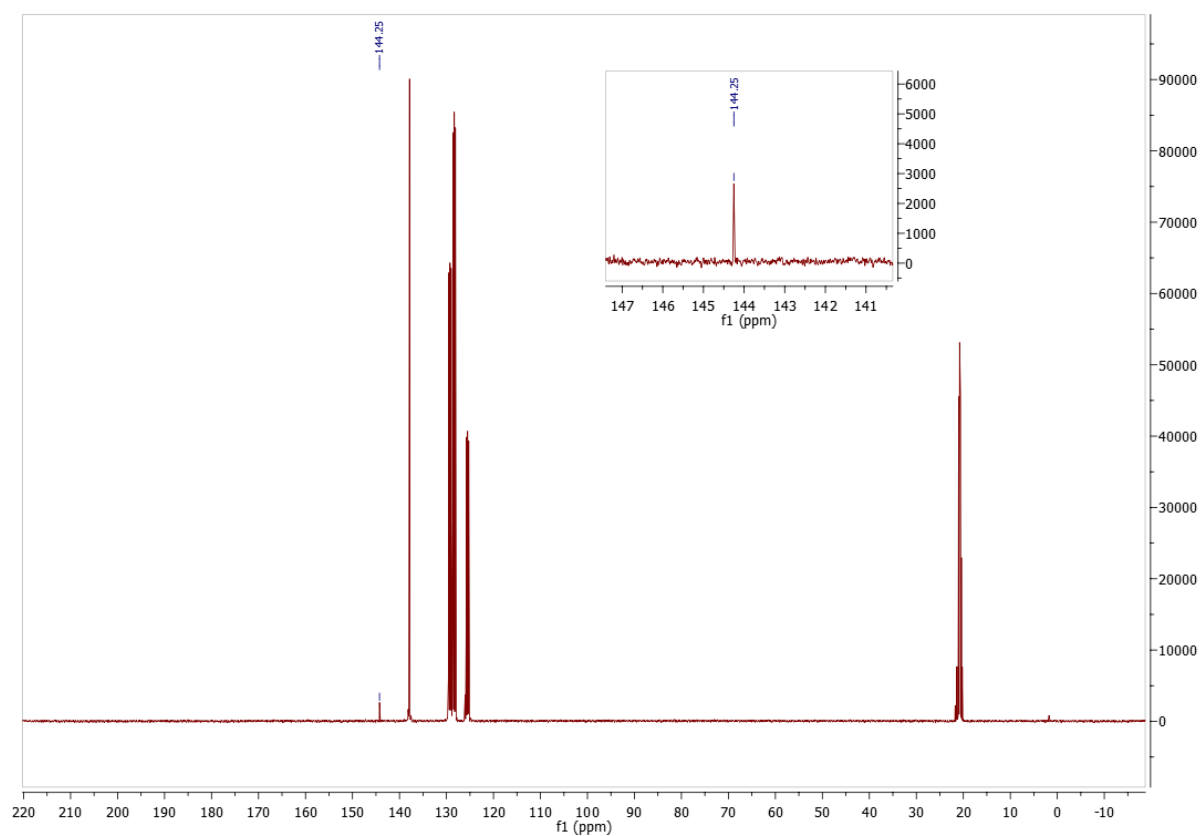

**Supplementary Fig. 10.**  $^{13}\text{C}$  NMR of  $\text{CH}_2\text{O}@\text{C}_{60}$ .

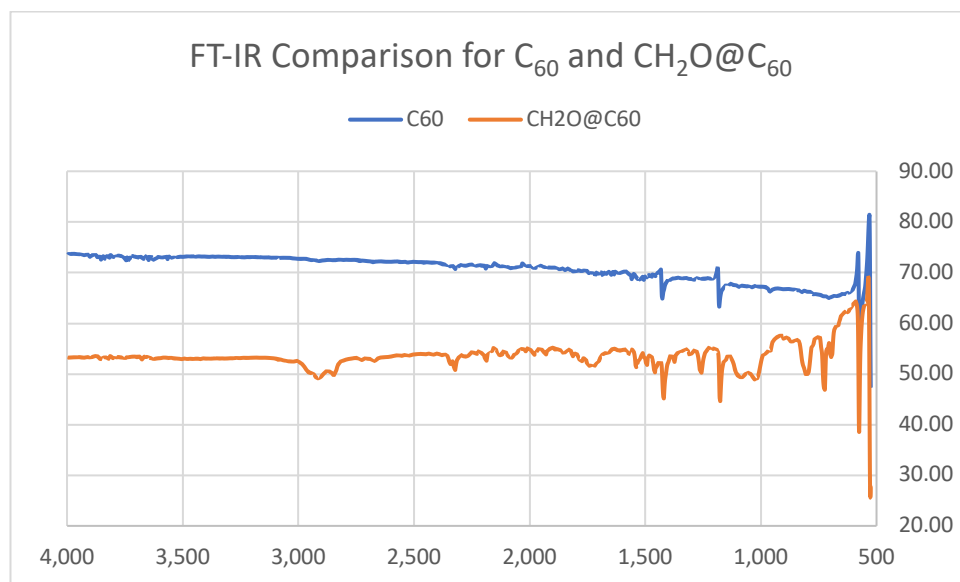

**Supplementary Fig. 11.** FT-IR comparison for  $\text{C}_{60}$  and  $\text{CH}_2\text{O}@\text{C}_{60}$ .

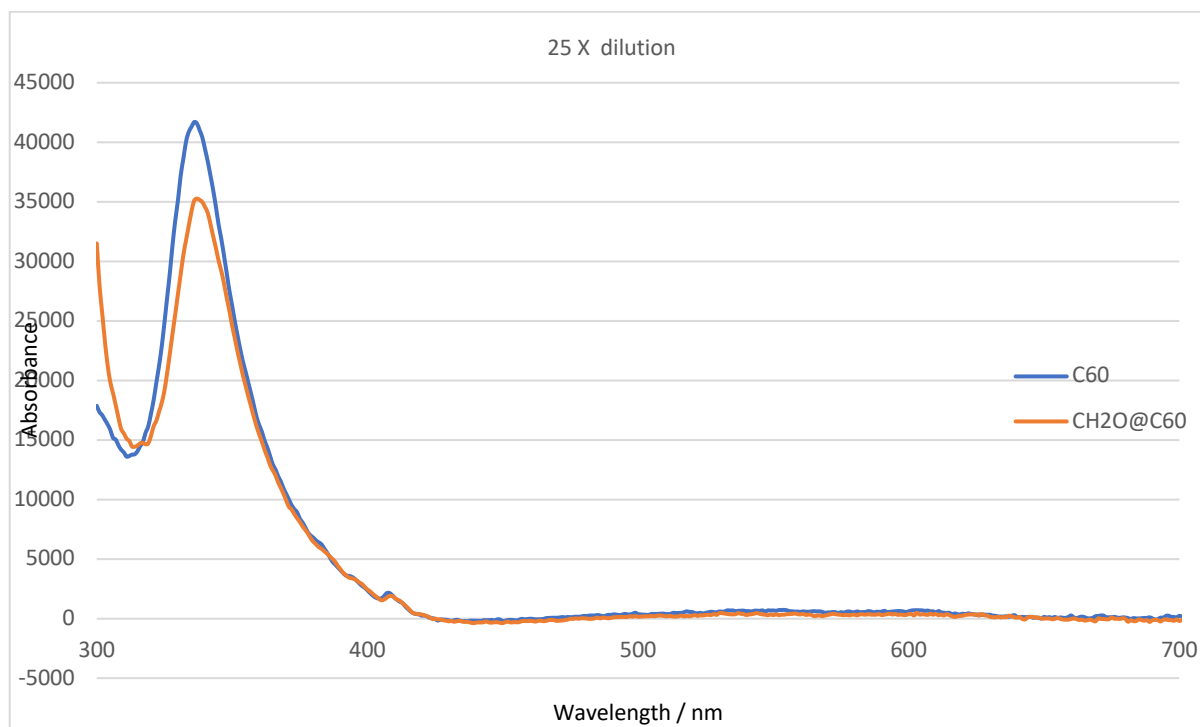

**Supplementary Fig. 12.** UV-vis spectra of  $\text{CH}_2\text{O}@\text{C}_{60}$  and  $\text{C}_{60}$ . The spectra in the figure was obtained from a solution of the fullerene in toluene ( $\text{CH}_2\text{O}@\text{C}_{60}$  approx.  $5.33 \times 10^{-5}$  M,  $\text{C}_{60}$  approx.  $5.55 \times 10^{-5}$  M) following serial dilution of a  $0.2 \text{ mg mL}^{-1}$  solution in toluene. For expansion of long wavelength region see main paper Figure 3a.

### $^{13}\text{CH}_2\text{O}@\text{C}_{60}$

$^1\text{H}$  NMR (700 MHz, toluene- $d_8$ )  $\delta$  3.804 ppm (d,  $J = 173.4$  Hz, 1H,  $\text{H}_2^{13}\text{CO}@\text{C}_{60}$ )

$^{13}\text{C}$  NMR (600 MHz, toluene- $d_8$ . Not proton decoupled)  $\delta$  197.93 (t,  $J = 173.4$  Hz, endohedral  $\text{CH}_2\text{O}@\text{C}_{60}$ ),  $\delta$  144.25 ( $\text{CH}_2\text{O}@\text{C}_{60}$ ).

HRMS (ESI) ( $m/z$ ): Calculated for  $[^{13}\text{CC}_{60}\text{H}_2\text{O}]^+$  751.0145, found 751.0133.

### $\text{CD}_2\text{O}@\text{C}_{60}$

$^2\text{H}$  NMR (77 MHz, toluene)  $\delta$  3.763.

$^{13}\text{C}$  NMR (126 MHz, toluene)  $\delta$  143.94. Formaldehyde carbon not observed.

HRMS (ESI) ( $m/z$ ): Calculated for  $[\text{C}_{61}\text{D}_2\text{O}]^+$  752.0237, found 752.0245.

#### 1.4 CH<sub>2</sub>O@6

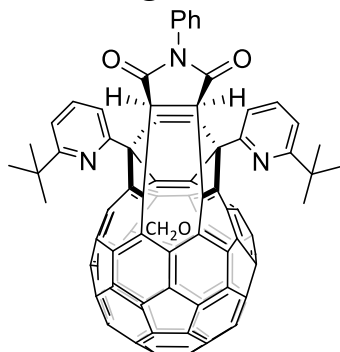

The mixture of CH<sub>2</sub>O@6 and H<sub>2</sub>O@6 + 6 with a ratio of 37:63 (still containing a 13 mol% impurity of N-Ph Maleimide), quoting <sup>1</sup>H and <sup>13</sup>C signal from CH<sub>2</sub>O@6 and H<sub>2</sub>O@6.

<sup>1</sup>H NMR (500 MHz, CDCl<sub>3</sub>)  $\delta$  7.755 (t,  $J$  = 7.8 Hz, 0.74H, pyridyl for CH<sub>2</sub>O@6), 7.749 (t,  $J$  = 7.8 Hz, 1.26H, pyridyl for H<sub>2</sub>O@6), 7.641 (dd,  $J$  = 7.7, 0.8 Hz, 0.74H, pyridyl for CH<sub>2</sub>O@6), 7.631 (dd,  $J$  = 7.7, 0.8 Hz, 1.26H, pyridyl for H<sub>2</sub>O@6), 7.495 – 7.395 (m, 3H, phenyl for CH<sub>2</sub>O@6 and H<sub>2</sub>O@6), 7.313 (dd,  $J$  = 7.9, 0.7 Hz, 0.74H, pyridyl for CH<sub>2</sub>O@6), 7.308 (dd,  $J$  = 7.9 Hz, 0.7 Hz, 1.26H, pyridyl for H<sub>2</sub>O@6), 7.296 – 7.269 (m, 2H, phenyl for CH<sub>2</sub>O@6 and H<sub>2</sub>O@6), 7.017 (s, 0.74H, alkenyl for CH<sub>2</sub>O@6), 6.991 (s, 1.26H, alkenyl for H<sub>2</sub>O@6), 5.610 (s, 0.74H, alkanyl for CH<sub>2</sub>O@6), 5.580 (s, 1.26H, alkanyl for H<sub>2</sub>O@6), 1.333 (s, 7H, *t*-butyl for CH<sub>2</sub>O@6), 1.331 (s, 11H, *t*-butyl for H<sub>2</sub>O@6), 1.055 (s, 0.70H, CH<sub>2</sub>O@6), -8.273 (s, 1.22H, H<sub>2</sub>O@6).

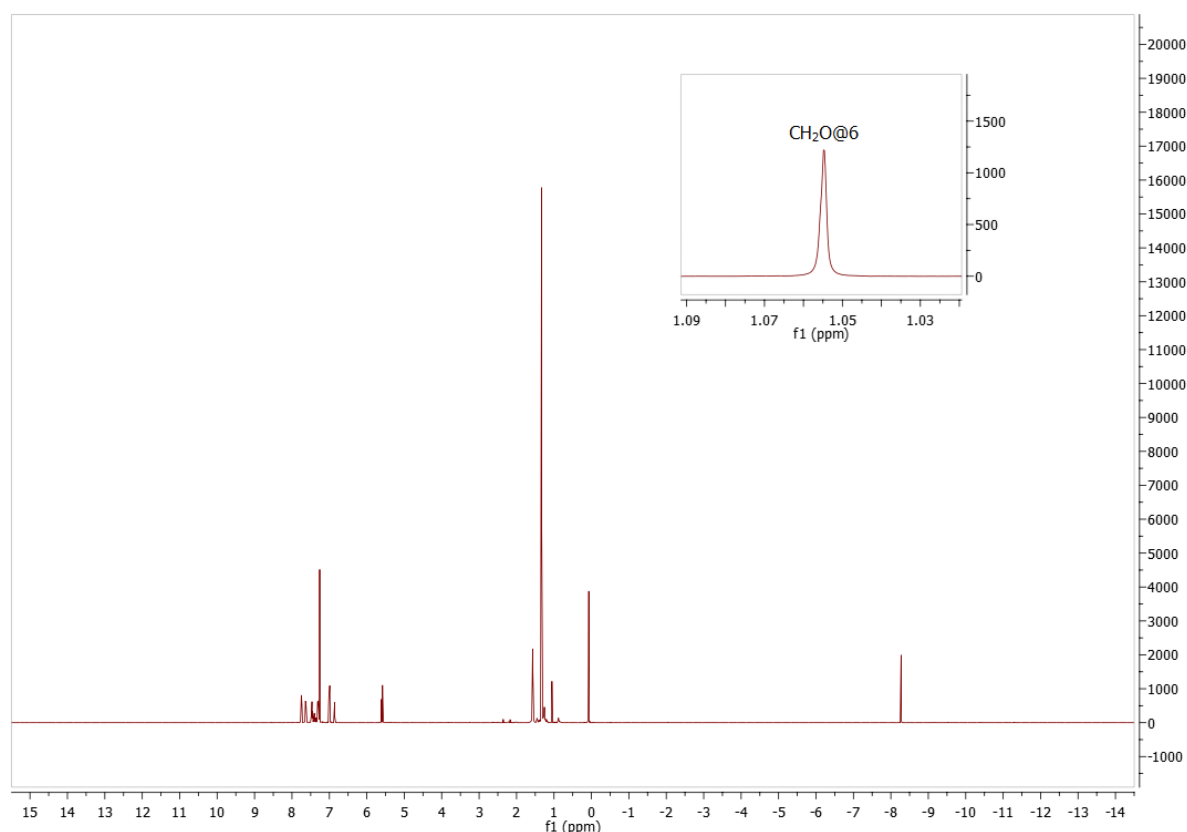

**Supplementary Fig. 13.**  $^1\text{H}$  NMR of  $\text{CH}_2\text{O@6}$  and  $\text{H}_2\text{O@6}$ .

$^{13}\text{C}$  NMR (126 MHz,  $\text{CDCl}_3$ )  $\delta$  191.52 ( $\text{CH}_2$ ,  $\text{CH}_2\text{O@6}$ ), 175.82 (C,  $\text{H}_2\text{O@6}$ ), 175.79 (C,  $\text{CH}_2\text{O@6}$ ), 169.26 (C,  $\text{CH}_2\text{O@6}$ ), 169.22 (C,  $\text{H}_2\text{O@6}$ ), 164.53 (C,  $\text{CH}_2\text{O@b}$ ), 164.50 (C,  $\text{H}_2\text{O@6}$ ), 148.60 (C,  $\text{CH}_2\text{O@6}$ ), 148.12 (C,  $\text{CH}_2\text{O@6}$ ), 148.06 (C,  $\text{CH}_2\text{O@6}$ ), 147.96 (C,  $\text{H}_2\text{O@6}$ ), 147.76 (C,  $\text{H}_2\text{O@6}$ ), 147.50 (C,  $\text{H}_2\text{O@6}$ ), 147.25 (C,  $\text{CH}_2\text{O@6}$ ), 147.22 (C,  $\text{H}_2\text{O@6}$ ), 147.21 (C,  $\text{CH}_2\text{O@6}$ ), 147.20 (C,  $\text{H}_2\text{O@6}$ ), 147.04 (C,  $\text{CH}_2\text{O@6}$ ), 146.57 (C,  $\text{CH}_2\text{O@6}$ ), 146.48 (C,  $\text{CH}_2\text{O@6}$ ), 146.41 (C,  $\text{CH}_2\text{O@6}$ ), 146.35 (C,  $\text{CH}_2\text{O@6}$ ), 146.21 (C,  $\text{H}_2\text{O@6}$ ), 146.09 (C,  $\text{H}_2\text{O@6}$ ), 145.98 (C,  $\text{CH}_2\text{O@6}$ ), 145.94 (C,  $\text{CH}_2\text{O@6}$ ), 145.88 (C,  $\text{CH}_2\text{O@6}$ ), 145.70 (C,  $\text{H}_2\text{O@6}$ ), 145.54 (C,  $\text{H}_2\text{O@6}$ ), 145.53 (C,  $\text{H}_2\text{O@6}$ ), 145.44 (C,  $\text{H}_2\text{O@6}$ ), 145.18 (C,  $\text{H}_2\text{O@6}$ ), 145.13 (C,  $\text{H}_2\text{O@6}$ ), 145.08 (C,  $\text{CH}_2\text{O@6}$ ), 143.12 (C,  $\text{CH}_2\text{O@6}$ ), 142.75 (C,  $\text{H}_2\text{O@b}$ ), 142.65 (C,  $\text{CH}_2\text{O@6}$ ), 142.44 (C,  $\text{H}_2\text{O@6}$ ), 141.54 (C,  $\text{CH}_2\text{O@6}$ ), 141.41 (C,  $\text{CH}_2\text{O@b}$ ), 141.19 (C,  $\text{H}_2\text{O@6}$ ), 141.15 (C,  $\text{H}_2\text{O@6}$ ), 140.61 (C,  $\text{CH}_2\text{O@6}$ ), 140.26 (C,  $\text{CH}_2\text{O@6}$ ), 140.13 (C,  $\text{CH}_2\text{O@6}$ ), 140.09 (C,  $\text{H}_2\text{O@6}$ ), 139.93 (C,  $\text{H}_2\text{O@6}$ ), 139.71 (C,  $\text{CH}_2\text{O@6}$ ), 139.32 (C,  $\text{CH}_2\text{O@6}$ ), 138.78 (C,  $\text{H}_2\text{O@6}$ ), 138.40 (C,  $\text{H}_2\text{O@6}$ ), 138.23 (C,  $\text{CH}_2\text{O@6}$ ), 138.19 (C,  $\text{H}_2\text{O@6}$ ), 137.85 (C,  $\text{H}_2\text{O@6}$ ), 137.75 (C,  $\text{H}_2\text{O@6}$ ), 137.47 (C,  $\text{CH}_2\text{O@6}$ ), 137.35 (CH,  $\text{CH}_2\text{O@6}$ ), 137.32 (CH,  $\text{H}_2\text{O@6}$ ), 137.01 (C,  $\text{CH}_2\text{O@6}$ ), 135.65 (C,  $\text{CH}_2\text{O@6}$ ), 135.44 (C,  $\text{H}_2\text{O@6}$ ), 134.87 (C,  $\text{CH}_2\text{O@6}$ ), 134.60 (C,

H<sub>2</sub>O@6), 132.26 (C, CH<sub>2</sub>O@6), 132.11 (C, H<sub>2</sub>O@6), 131.92 (C, H<sub>2</sub>O@b), 131.91 (C, CH<sub>2</sub>O@6), 131.68 (C, CH<sub>2</sub>O@6), 131.49 (C, H<sub>2</sub>O@6), 131.13 (CH, CH<sub>2</sub>O@6), 131.11 (CH, H<sub>2</sub>O@6), 130.35 (C, CH<sub>2</sub>O@6), 129.72 (C, H<sub>2</sub>O@6), 129.48 (CH, CH<sub>2</sub>O@6), 129.47 (CH, H<sub>2</sub>O@6), 129.23 (CH, CH<sub>2</sub>O@6), 129.21 (CH, H<sub>2</sub>O@6), 126.67 (CH, H<sub>2</sub>O@6+CH<sub>2</sub>O@6), 120.31 (CH, CH<sub>2</sub>O@6), 120.26 (CH, H<sub>2</sub>O@6), 117.46 (CH, CH<sub>2</sub>O@6), 117.43 (CH, H<sub>2</sub>O@6), 58.28 (C, CH<sub>2</sub>O@6), 58.06 (C, H<sub>2</sub>O@6), 54.00 (CH, H<sub>2</sub>O@6+CH<sub>2</sub>O@6), 37.99 (C, CH<sub>2</sub>O@6), 37.98 (C, H<sub>2</sub>O@6), 30.16 (CH<sub>3</sub>, H<sub>2</sub>O@6+CH<sub>2</sub>O@6). Spectra assigned to CH<sub>2</sub>O@6 or H<sub>2</sub>O@6 using the relative sizes of peaks, the reported spectra of H<sub>2</sub>O@6,<sup>5</sup> and HSQC C-H correlation spectra.

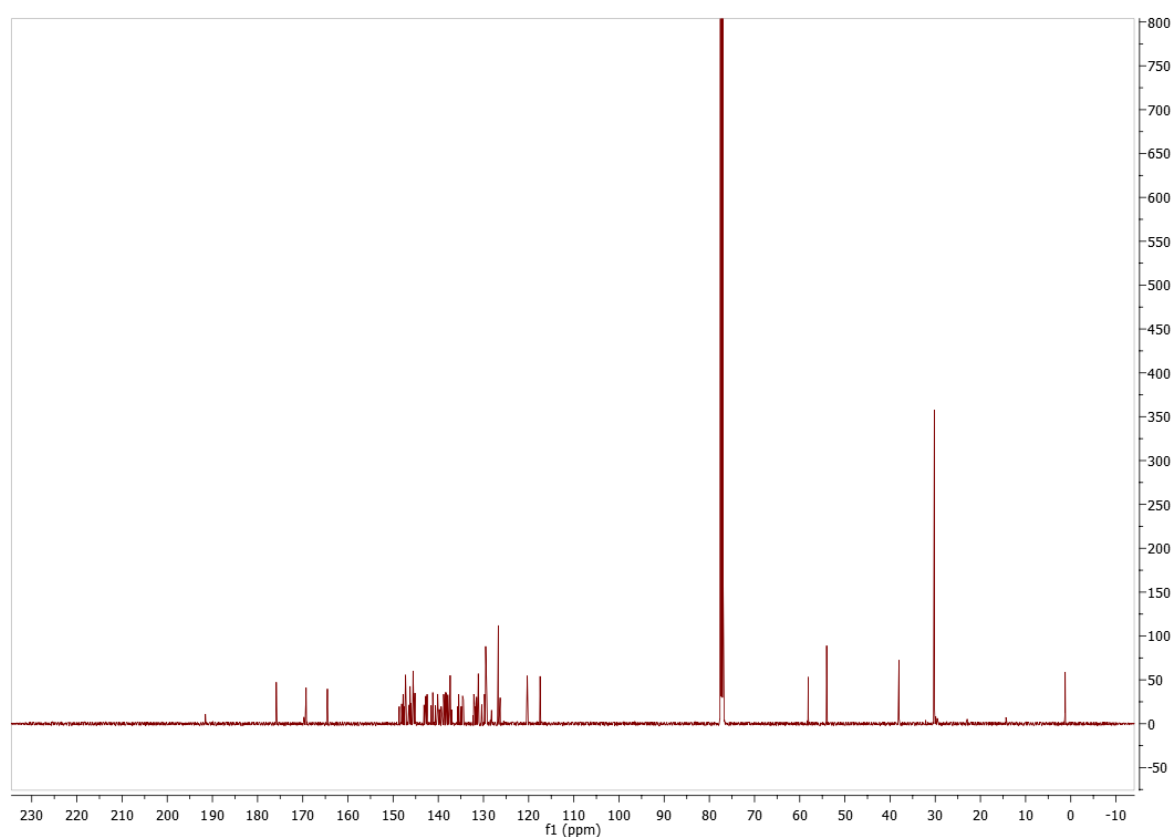

**Supplementary Fig. 14.** <sup>13</sup>C NMR of CH<sub>2</sub>O@6 and H<sub>2</sub>O@6.

**HRMS (ESI+)** (*m/z*): Calculated for [C<sub>93</sub>H<sub>36</sub>N<sub>3</sub>O<sub>3</sub>]<sup>+</sup> 1242.2751, found 1242.2727(CH<sub>2</sub>O@6). Calculated for [C<sub>92</sub>H<sub>34</sub>N<sub>3</sub>O<sub>2</sub>]<sup>+</sup> 1212.2646, found 1212.2610 (empty 6). Calculated for [C<sub>92</sub>H<sub>34</sub>N<sub>3</sub>O<sub>3</sub>]<sup>+</sup> 1230.2751, found 1230.2726 (H<sub>2</sub>O@6).

### 1.5 CO<sub>2</sub>@Sulfoxide

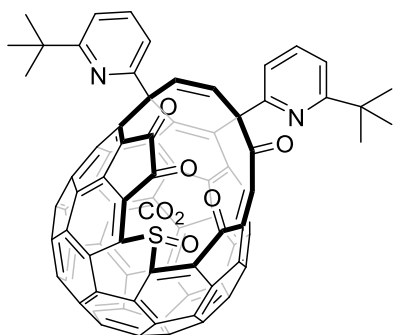

The mixture of CO<sub>2</sub>@**2** and H<sub>2</sub>O@**2** with a ratio of 90:10. Only peaks from CO<sub>2</sub>@**2** are listed.

<sup>1</sup>H NMR (400 MHz, CDCl<sub>3</sub>)  $\delta$  7.609 (t,  $J$  = 7.9 Hz, 1H, pyridyl), 7.585 (t,  $J$  = 7.9 Hz, 1H, pyridyl), 7.312 (dd,  $J$  = 7.9, 0.8 Hz, 1H, pyridyl), 7.278-7.145 (m, 4H, pyridyl and alkenyl protons, region mainly obscured by the toluene), 6.805 (d,  $J$  = 10.3 Hz, 1H), 1.182 (s, 9H, *t*-butyl).

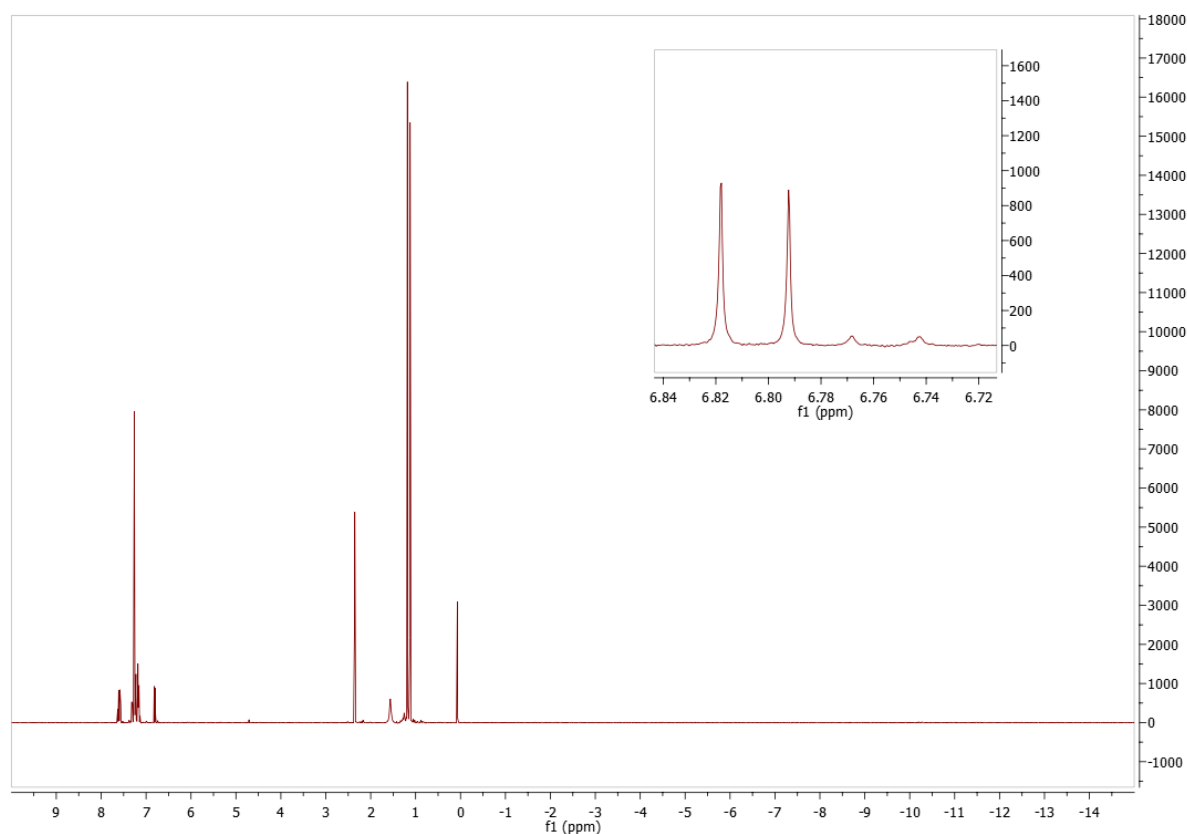

**Supplementary Fig. 15.** <sup>1</sup>H NMR of CO<sub>2</sub>@**2** and H<sub>2</sub>O@**2**.

<sup>13</sup>C NMR (101 MHz, CDCl<sub>3</sub>)  $\delta$  190.66(C), 185.08(C), 184.45(C), 180.88(C), 169.05(C), 168.72(C), 163.34(C), 162.08(C), 157.17(C), 155.77(C), 151.62(C), 151.42(C), 151.20(C),

151.18(C), 151.00(C), 150.84(C), 150.78(C), 150.68(C), 150.65(C), 150.44(C), 150.35(C), 149.81(C), 149.65(C), 148.12(C), 147.89(C), 147.56(C), 147.12(C), 145.18(C), 145.06(C), 144.80(C), 144.68(C), 144.62(C), 144.43(C), 143.94(C), 143.78(C), 143.65(C), 143.46(C), 143.26(C), 143.16(C), 141.89(C), 141.83(C), 140.85(C), 140.71(C), 140.57(C), 139.39(C), 139.13(C), 138.76(C), 138.08(), 137.94(C), 137.74(CH), 137.50(C), 137.43(CH), 137.15(C), 136.98(C), 136.87(C), 136.63(C), 136.37(C), 136.34(C), 136.12(C), 134.43(C), 133.91(C), 131.81(C), 131.37(C), 129.88(C), 128.10(C), 126.33(C), 126.01(C), 125.91(CH), 120.38(CH), 119.77(CH), 117.86(CH), 117.67(CH), 114.21 (CH), 59.49(C), 55.22(C), 37.94(C), 37.91(C), 31.15 (C), 30.09 (6xCH<sub>3</sub>). Only signals from CO<sub>2</sub>@**2** reported.

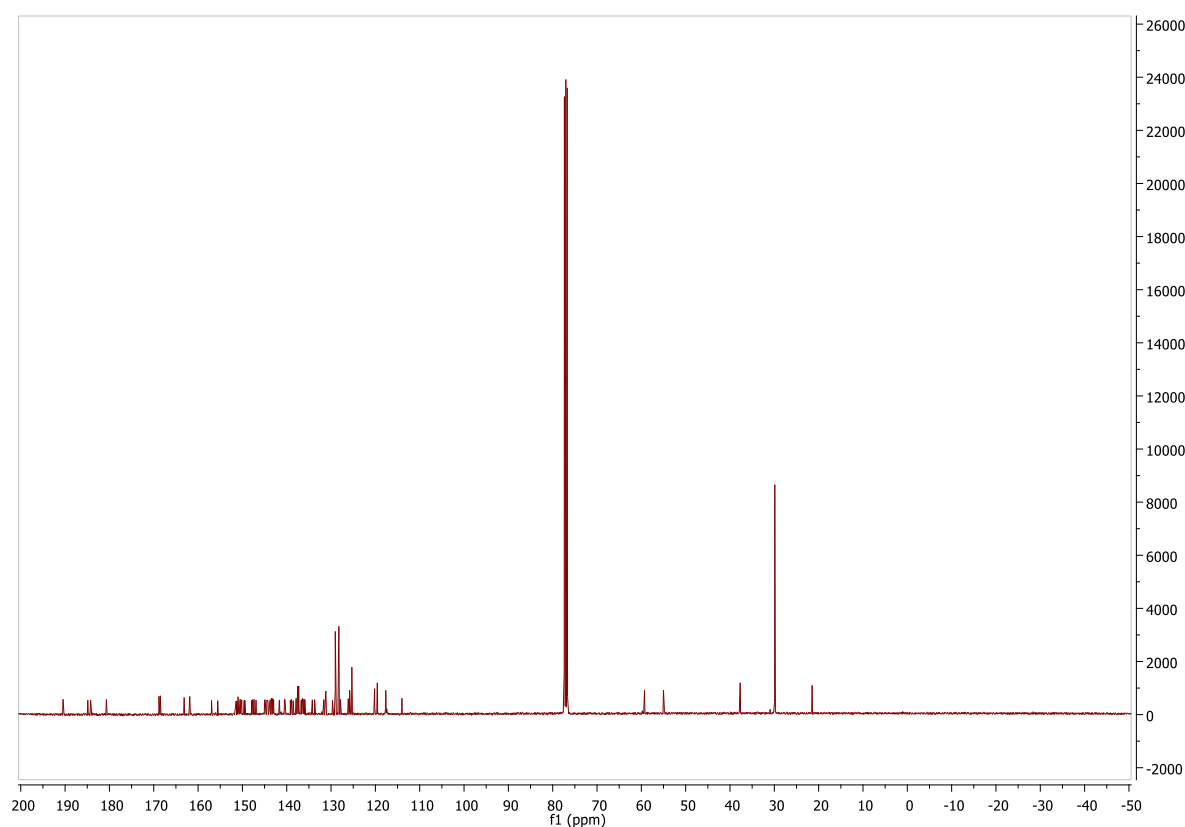

**Supplementary Fig. 16.** <sup>13</sup>C NMR of CO<sub>2</sub>@**2**.

**HRMS (ESI+)** (*m/z*): Calculated for [C<sub>83</sub>H<sub>27</sub>N<sub>2</sub>O<sub>7</sub>S]<sup>+</sup> 1195.1553, found 1195.1550(CO<sub>2</sub>@**2**).

Calculated for [C<sub>82</sub>H<sub>27</sub>N<sub>2</sub>O<sub>5</sub>S]<sup>+</sup> 1151.1635, found 1151.1651 (empty).



2. Kinetics of loss of CH<sub>2</sub>O from CH<sub>2</sub>O@1 and CH<sub>2</sub>O@2 and of CO<sub>2</sub> from CO<sub>2</sub>@2,

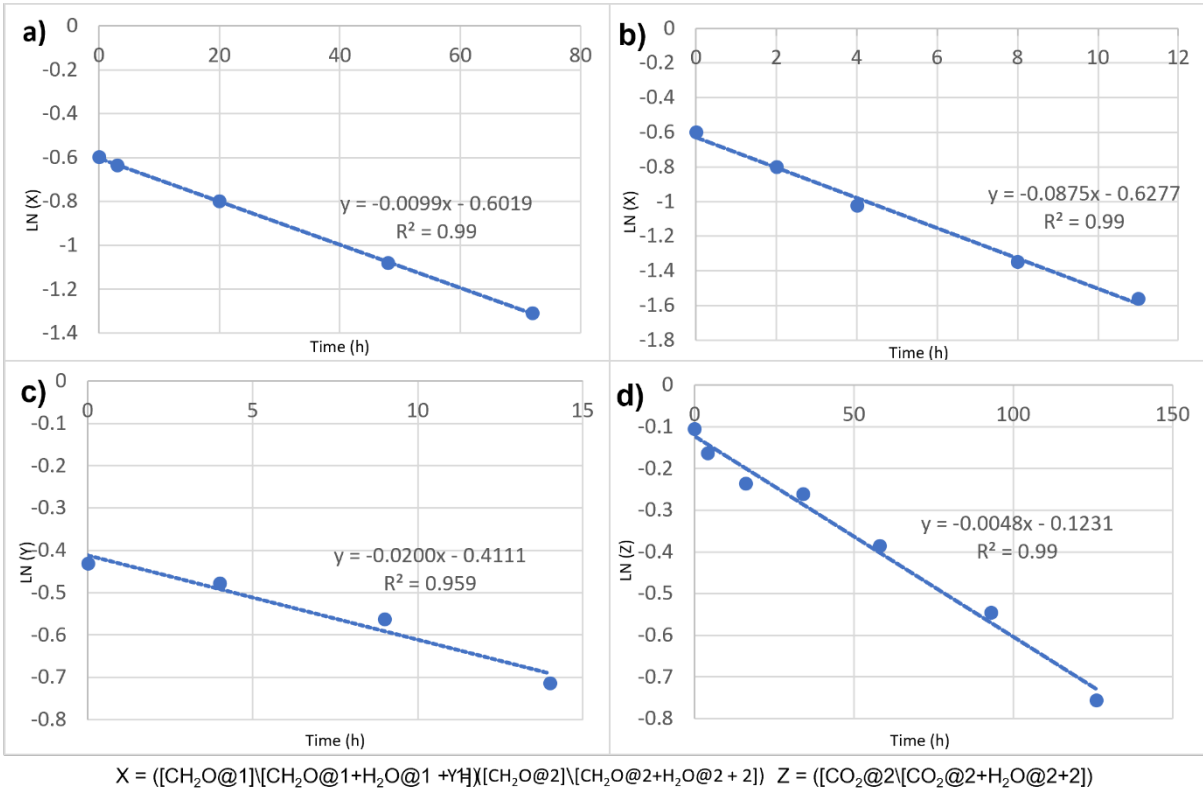

**Supplementary Fig. 17.** 1<sup>st</sup> order plots for loss of: (a) CH<sub>2</sub>O from CH<sub>2</sub>O@1 at 25 °C and (b) 40 °C; (c) CH<sub>2</sub>O from CH<sub>2</sub>O@2 at 55 °C; (d) loss of CO<sub>2</sub> from CO<sub>2</sub>@2 at 55 °C.

**Supplementary Table 1.** Loss of CH<sub>2</sub>O from CH<sub>2</sub>O@1

| 25 °C           |                | 40 °C          |                |
|-----------------|----------------|----------------|----------------|
| Time            | Filling Factor | Time           | Filling Factor |
| 0               | 0.55           | 0              | 0.55           |
| 3               | 0.53           | 2              | 0.45           |
| 20              | 0.45           | 4              | 0.36           |
| 48              | 0.34           | 8              | 0.26           |
| 72              | 0.27           | 11             | 0.21           |
| Half-life = 70h |                | Half-life = 8h |                |

**Supplementary Table 2.** Loss of CH<sub>2</sub>O from CH<sub>2</sub>O@2 at 55 °C.

| 55 °C              |                |
|--------------------|----------------|
| Time               | Filling Factor |
| 0                  | 0.65           |
| 4                  | 0.62           |
| 9                  | 0.57           |
| 14                 | 0.49           |
| Half-life = 34.6 h |                |

**Supplementary Table 3.** Loss of CO<sub>2</sub> from CO<sub>2</sub>@2 at 55 °C

| 55 °C             |                |
|-------------------|----------------|
| Time              | Filling Factor |
| 0                 | 0.90           |
| 4                 | 0.85           |
| 16                | 0.79           |
| 34                | 0.77           |
| 58                | 0.69           |
| 93                | 0.58           |
| 126               | 0.47           |
| Half-life = 144 h |                |

**3. Voltammetry of CH<sub>2</sub>O@C<sub>60</sub>.**

For DPV see Fig. 3b in main paper.

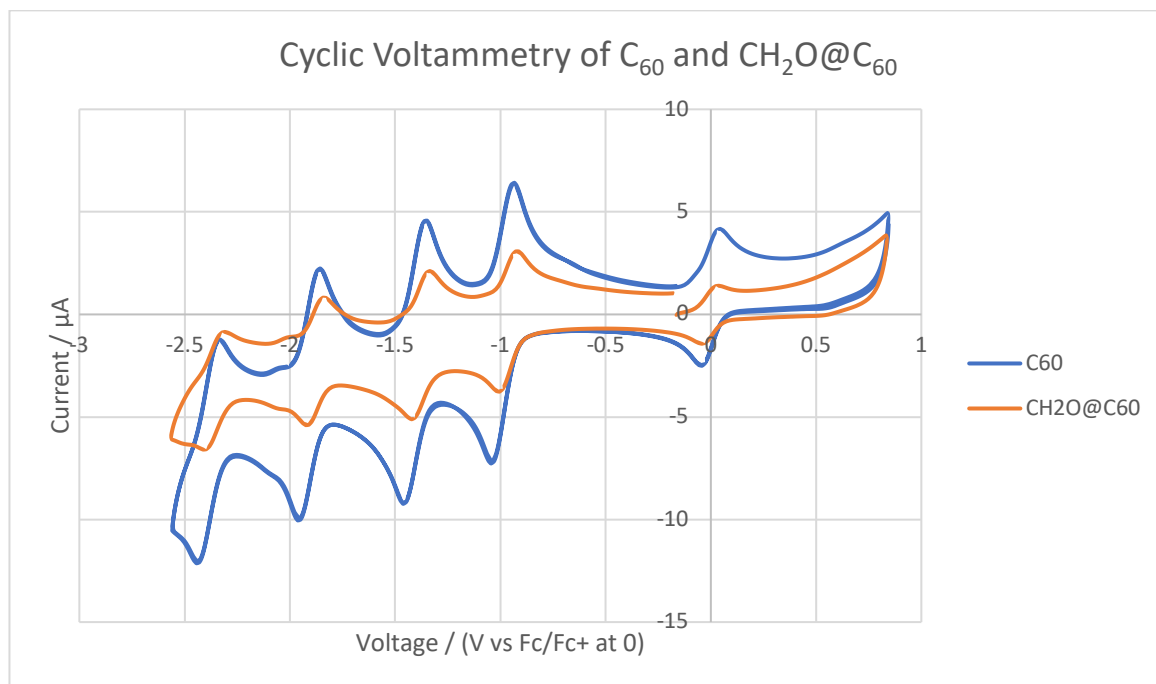**Supplementary Fig. 18.** Cyclic Voltammetry of C<sub>60</sub> and CH<sub>2</sub>O@C<sub>60</sub>.**Supplementary Table 4.** Reduction potential of C<sub>60</sub> and CH<sub>2</sub>O@C<sub>60</sub> reported relative to the Fc/Fc<sup>+</sup> couple at 0V.

| Reduction | CV              |                                   | DPV             |                                   |
|-----------|-----------------|-----------------------------------|-----------------|-----------------------------------|
|           | C <sub>60</sub> | CH <sub>2</sub> O@C <sub>60</sub> | C <sub>60</sub> | CH <sub>2</sub> O@C <sub>60</sub> |
| 1st       | -0.984          | -0.953                            | -0.982          | -0.952                            |
| 2nd       | -1.398          | -1.372                            | -1.405          | -1.375                            |
| 3rd       | -1.902          | -1.874                            | -1.898          | -1.868                            |
| 4th       | -2.380          | -2.351                            | -2.377          | -2.346                            |

#### 4. Density Functional Theory Calculations

Cartesian coordinates are in a separate file.

Model structures **1a** and **2a** were used to represent compounds **1** and **2**, in which the 6-tert-butylpyridyl groups were replaced by methyl substituents. Geometry optimisation and frequency calculations used the cc-pVDZ basis set. Electronic energies and counterpoise correction for Basis Set Superposition Error used the cc-pVTZ basis set.

**Supplementary Table 5. DFT Energies (Hartree) for calculated species**

|                                                                | B3LYP          |                   |                | M06-2X         |                   |                |
|----------------------------------------------------------------|----------------|-------------------|----------------|----------------|-------------------|----------------|
|                                                                | E <sup>a</sup> | BSSE <sup>b</sup> | G <sup>c</sup> | E <sup>a</sup> | BSSE <sup>b</sup> | G <sup>c</sup> |
| H <sub>2</sub> O                                               | -76.4603       |                   | 0.0034         | -76.4253       |                   | 0.0040         |
| CH <sub>2</sub> O                                              | -114.5510      |                   | 0.0053         | -114.4966      |                   | 0.0060         |
| CO <sub>2</sub>                                                | -188.6622      |                   | -0.0091        | -188.5916      |                   | -0.00867       |
| <b>1a</b>                                                      | -3219.9584     |                   | 0.4590         | -3218.6794     |                   | 0.4659         |
| <b>2a</b>                                                      | -3295.1660     |                   | 0.4607         | -3293.8558     |                   | 0.4677         |
| H <sub>2</sub> O@ <b>1a</b>                                    | -3296.4438     | 0.0060            | 0.4783         | -3295.1309     | 0.0048            | 0.4867         |
| TS <b>1a</b> +H <sub>2</sub> O ⇌ H <sub>2</sub> O@ <b>1a</b>   | -3296.4304     | 0.0066            | 0.4822         | -3295.1197     | 0.0052            | 0.4894         |
| CH <sub>2</sub> O@ <b>1a</b>                                   | -3334.5379     | 0.0032            | 0.4849         | -3333.2060     | 0.0031            | 0.4925         |
| TS <b>1a</b> +CH <sub>2</sub> O ⇌ CH <sub>2</sub> O@ <b>1a</b> | -3334.5045     | 0.0034            | 0.4883         | -3333.1731     | 0.0032            | 0.4957         |
| CH <sub>2</sub> O@ <b>2a</b>                                   | -3409.7454     | 0.0033            | 0.4859         | -3408.3825     | 0.0032            | 0.4947         |
| TS <b>2a</b> +CH <sub>2</sub> O ⇌ CH <sub>2</sub> O@ <b>2a</b> | -3409.7070     | 0.0034            | 0.4894         | -3408.3449     | 0.0034            | 0.4982         |
| CO <sub>2</sub> @ <b>2a</b>                                    | -3483.8538     | 0.0032            | 0.4699         | -3482.4743     | 0.0033            | 0.4766         |
| TS <b>2a</b> +CO <sub>2</sub> ⇌ CH <sub>2</sub> O@ <b>2a</b>   | -3483.8089     | 0.0031            | 0.4722         | -3482.4317     | 0.0030            | 0.4798         |

a. Electronic energy. b. correction for basis set superposition error. c. Thermal correction to give free energy at STP.

**Supplementary Table 6.** Calculated free energies of binding, entry and exit of the endohedral species in kJ mol<sup>-1</sup>.

|                                                             | B3LYP       |                             |                            | M06-2X      |                             |                            |
|-------------------------------------------------------------|-------------|-----------------------------|----------------------------|-------------|-----------------------------|----------------------------|
|                                                             | G<br>(bind) | G <sup>act</sup><br>(entry) | G <sup>act</sup><br>(exit) | G<br>(bind) | G <sup>act</sup><br>(entry) | G <sup>act</sup><br>(exit) |
| <b>1a</b> +H <sub>2</sub> O ⇌ H <sub>2</sub> O@ <b>1a</b>   | -8.5        | 38.2                        | 46.8                       | -11.9       | 25.6                        | 37.5                       |
| <b>1a</b> +CH <sub>2</sub> O ⇌ CH <sub>2</sub> O@ <b>1a</b> | -12.4       | 84.5                        | 96.9                       | -16.8       | 78.0                        | 94.9                       |
| <b>2a</b> +CH <sub>2</sub> O ⇌ CH <sub>2</sub> O@ <b>2a</b> | -13.8       | 96.5                        | 110.3                      | -15.9       | 92.5                        | 108.4                      |
| <b>2a</b> +CO <sub>2</sub> ⇌ CO <sub>2</sub> @ <b>2a</b>    | -10.6       | 113.2                       | 123.8                      | -16.0       | 103.7                       | 119.7                      |

The activation energy and binding energy ( $\Delta G$  at 298K) for entry of CH<sub>2</sub>O into a model for **1** in which the pyridyl tert-butyl groups are replaced by hydrogens using M06-2X / 6-31G\* has been reported<sup>1</sup> as 16.6 kCal/mol (69.5 kJ/mol) and -9.9 kCal/mol (-41.4 kJ/mol) without

counterpoise correction for the basis set superposition error<sup>2</sup> which makes a significant difference (our M06-2X/cc-pVTZ//cc-pVDZ values are 69.6 and -25.0 kJ/mol without correction). Our calculations at the M06-2X/6-31G\* level give  $\Delta G$  for entry and binding of 65.8 and -35.0 kJ/mol (15.7 and -8.4 kCal/mol) respectively without counterpoise correction in good agreement with the published values above, but these become 90.4 and -11.8 kJ/mol (21.6 and -2.8 kCal/mol) with correction illustrating its impact, particularly with small basis sets.

## 4.2. Calculated Properties of CH<sub>2</sub>O@C<sub>60</sub>.

Cartesian coordinates are in a separate file.

### 4.2.1 Minimised structures of CH<sub>2</sub>O@C<sub>60</sub> and C<sub>60</sub>.

Two very close minimum energy structures for CH<sub>2</sub>O@C<sub>60</sub> were identified at the cc-pVTZ/tight level. One in which the CH<sub>2</sub>O C-O axis was aligned with the centre of the bond between a 5 and 6 member ring (formally a single bond) denoted 'CH<sub>2</sub>O@C<sub>60</sub> 56 iso' and one aligned with the centre of the bond between two six member rings (formally a double bond) denoted 'CH<sub>2</sub>O@C<sub>60</sub> 66 iso' (Supplementary Fig. 19). The later was 0.1 kJ mol<sup>-1</sup> higher in energy – confirmed by single point energy calculations at the cc-pVQZ level and not changed in either case by inclusion of Basis Set Superposition Error correction (using counterpoise calculations).<sup>2</sup> As they are so close in energy results for both conformers are given below.

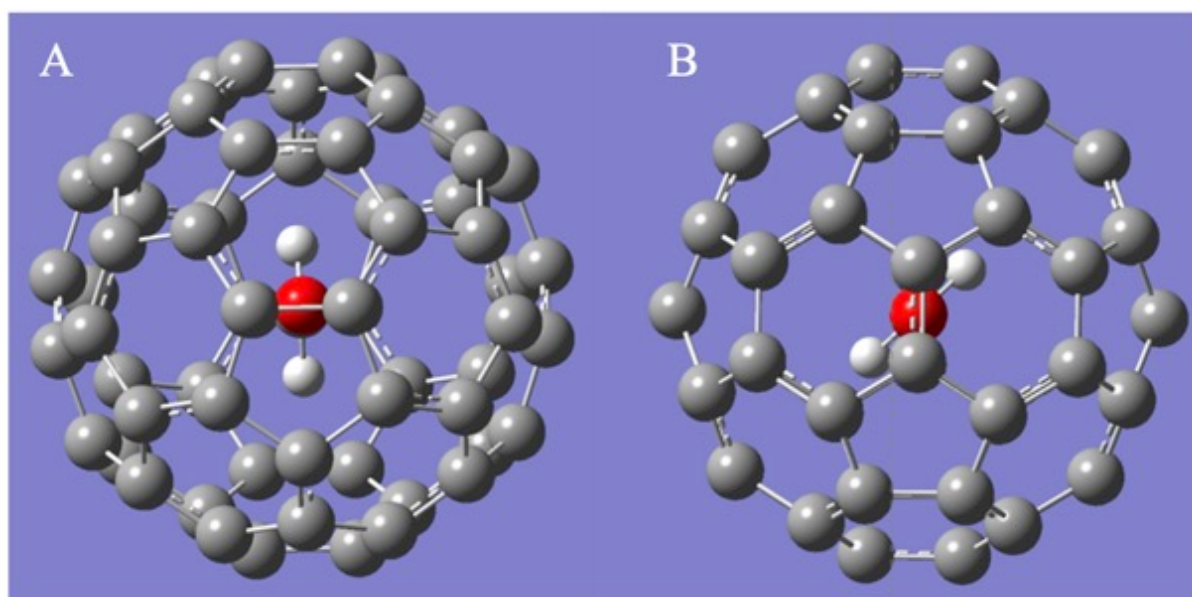

**Supplementary Fig. 19.** Minimum energy conformers of CH<sub>2</sub>O@C<sub>60</sub>. **A** – CH<sub>2</sub>O@C<sub>60</sub> 56 iso. **B**- CH<sub>2</sub>O@C<sub>60</sub> 66 iso.

**Supplementary Table 7.** Diameters of CH<sub>2</sub>O@C<sub>60</sub> and C<sub>60</sub> in Å.

| CH <sub>2</sub> O@C <sub>60</sub> 56 iso |     |         |   | CH <sub>2</sub> O@C <sub>60</sub> 66 iso |     |         |   | C <sub>60</sub> |     |         |
|------------------------------------------|-----|---------|---|------------------------------------------|-----|---------|---|-----------------|-----|---------|
| C36                                      | C44 | 7.0768  | c | C1                                       | C52 | 7.1212  | a | C26             | C50 | 7.0789  |
| C32                                      | C21 | 7.0792  |   | C42                                      | C7  | 7.1204  | a | C27             | C49 | 7.0787  |
| C33                                      | C20 | 7.0898  |   | C10                                      | C40 | 7.0963  |   | C51             | C8  | 7.0789  |
| C57                                      | C14 | 7.0778  |   | C9                                       | C41 | 7.0893  |   | C2              | C53 | 7.0791  |
| C58                                      | C45 | 7.0765  | c | C8                                       | C51 | 7.1041  |   | C3              | C56 | 7.0789  |
| C54                                      | C11 | 7.0614  |   | C2                                       | C53 | 7.1173  |   | C46             | C60 | 7.0791  |
| C55                                      | C15 | 7.0715  |   | C50                                      | C26 | 7.0676  |   | C47             | C59 | 7.0790  |
| C24                                      | C23 | 7.0811  |   | C48                                      | C35 | 7.0837  |   | C1              | C52 | 7.0791  |
| C25                                      | C22 | 7.0694  | b | C49                                      | C27 | 7.0669  |   | C41             | C9  | 7.0789  |
| C34                                      | C12 | 7.0591  | b | C57                                      | C14 | 7.0648  |   | C35             | C48 | 7.0789  |
| C51                                      | C8  | 7.0718  |   | C33                                      | C20 | 7.0642  |   | C54             | C11 | 7.0790  |
| C35                                      | C48 | 7.0598  |   | C32                                      | C21 | 7.0599  | b | C55             | C15 | 7.0788  |
| C27                                      | C49 | 7.0620  |   | C36                                      | C44 | 7.0604  | b | C24             | C23 | 7.0790  |
| C26                                      | C50 | 7.0738  |   | C58                                      | C45 | 7.0650  |   | C25             | C22 | 7.0789  |
| C41                                      | C9  | 7.0850  |   | C43                                      | C4  | 7.0908  |   | C34             | C12 | 7.0788  |
| C39                                      | C6  | 7.1156  | a | C38                                      | C5  | 7.1050  |   | C16             | C31 | 7.0786  |
| C42                                      | C7  | 7.1181  | a | C31                                      | C16 | 7.0841  |   | C5              | C38 | 7.0786  |
| C40                                      | C10 | 7.1102  |   | C30                                      | C17 | 7.0672  |   | C4              | C43 | 7.0788  |
| C29                                      | C18 | 7.1094  |   | C37                                      | C13 | 7.0685  |   | C13             | C37 | 7.0789  |
| C28                                      | C19 | 7.1063  |   | C23                                      | C24 | 7.0793  |   | C17             | C30 | 7.0788  |
| C37                                      | C13 | 7.0845  |   | C15                                      | C55 | 7.0715  |   | C58             | C45 | 7.0790  |
| C43                                      | C4  | 7.1084  |   | C11                                      | C54 | 7.0800  |   | C36             | C44 | 7.0788  |
| C38                                      | C5  | 7.1050  |   | C12                                      | C34 | 7.0796  | c | C32             | C21 | 7.0791  |
| C31                                      | C16 | 7.0785  |   | C22                                      | C25 | 7.0794  | c | C33             | C20 | 7.0791  |
| C30                                      | C17 | 7.0696  |   | C60                                      | C46 | 7.0823  |   | C57             | C14 | 7.0789  |
| C1                                       | C52 | 7.1077  |   | C56                                      | C3  | 7.0952  |   | C40             | C10 | 7.0788  |
| C2                                       | C53 | 7.0806  |   | C59                                      | C47 | 7.0980  |   | C29             | C18 | 7.0788  |
| C3                                       | C56 | 7.0703  |   | C39                                      | C6  | 7.1167  |   | C28             | C19 | 7.0788  |
| C46                                      | C60 | 7.0848  |   | C28                                      | C19 | 7.0938  |   | C39             | C6  | 7.0789  |
| C47                                      | C59 | 7.1092  |   | C29                                      | C18 | 7.0806  |   | C42             | C7  | 7.0789  |
| Average:                                 |     | 7.08511 |   | Average:                                 |     | 7.08510 |   | Average:        |     | 7.07889 |

a Along CH<sub>2</sub>O CO-axis. b Perpendicular to CH<sub>2</sub>O plane. c In plane of CH<sub>2</sub>O

**Supplementary Table 8.** Calculated diameters of CH<sub>2</sub>O@C<sub>60</sub> and C<sub>60</sub> cages.

|                                          | CH <sub>2</sub> O@C <sub>60</sub> 56 iso |                 |                      | CH <sub>2</sub> O@C <sub>60</sub> 66 iso |                 |                      |
|------------------------------------------|------------------------------------------|-----------------|----------------------|------------------------------------------|-----------------|----------------------|
|                                          |                                          | Difference / pm |                      |                                          | Difference / pm |                      |
| Diameters                                | Diameter/Å                               | from average    | from C <sub>60</sub> | Diameter/Å                               | from average    | from C <sub>60</sub> |
| Average                                  | 7.08511                                  |                 | 0.621                | 7.08510                                  |                 | 0.621                |
| Along CO-axis                            | 7.1169                                   | 3.17            | 3.80                 | 7.1208                                   | 3.57            | 4.19                 |
| Perpendicular to CH <sub>2</sub> O plane | 7.0643                                   | -2.09           | -1.46                | 7.0602                                   | -2.50           | -1.87                |
| In plane of CH <sub>2</sub> O            | 7.0767                                   | -0.85           | -0.22                | 7.0795                                   | -0.56           | 0.06                 |

*4.2.2 Molecular orbital energies of CH<sub>2</sub>O@C<sub>60</sub> and C<sub>60</sub>.***Supplementary Table 9.** Calculated Molecular Orbital Energies of CH<sub>2</sub>O@C<sub>60</sub> and C<sub>60</sub>.

|               | C <sub>60</sub>  |         | CH <sub>2</sub> O@C <sub>60</sub> 56 iso |         |            | CH <sub>2</sub> O@C <sub>60</sub> 66 iso |         |            |
|---------------|------------------|---------|------------------------------------------|---------|------------|------------------------------------------|---------|------------|
|               | orbital energies |         | orbital energies                         |         | difference | orbital energies                         |         | difference |
|               | Ha               | eV      | Ha                                       | eV      | meV        | Ha                                       | eV      | meV        |
|               | -0.08692         | -2.3652 | -0.0882                                  | -2.4000 | -34.8      | -0.08808                                 | -2.3968 | -31.6      |
|               | -0.13211         | -3.5949 | -0.13267                                 | -3.6101 | -15.2      | -0.13275                                 | -3.6123 | -17.4      |
|               | -0.13211         | -3.5949 | -0.1328                                  | -3.6137 | -18.8      | -0.13278                                 | -3.6131 | -18.2      |
| LUMO          | -0.13211         | -3.5949 | -0.13339                                 | -3.6297 | -34.8      | -0.13332                                 | -3.6278 | -32.9      |
| HOMO          | -0.23308         | -6.3424 | -0.23295                                 | -6.3389 | 3.5        | -0.23303                                 | -6.3411 | 1.4        |
|               | -0.23308         | -6.3424 | -0.23338                                 | -6.3506 | -8.2       | -0.23332                                 | -6.3489 | -6.5       |
|               | -0.23308         | -6.3424 | -0.23349                                 | -6.3536 | -11.2      | -0.23344                                 | -6.3522 | -9.8       |
|               | -0.23308         | -6.3424 | -0.23382                                 | -6.3626 | -20.1      | -0.23367                                 | -6.3585 | -16.1      |
|               | -0.23308         | -6.3424 | -0.23436                                 | -6.3772 | -34.8      | -0.23457                                 | -6.3830 | -40.5      |
|               | -0.28262         | -7.6905 | -0.28158                                 | -7.6622 | 28.3       | -0.2814                                  | -7.6573 | 33.2       |
| HOMO-LUMO gap | 0.10097          | 2.7475  | 0.09956                                  | 2.709   | -38.4      | 0.09971                                  | 2.7132  | -34.3      |

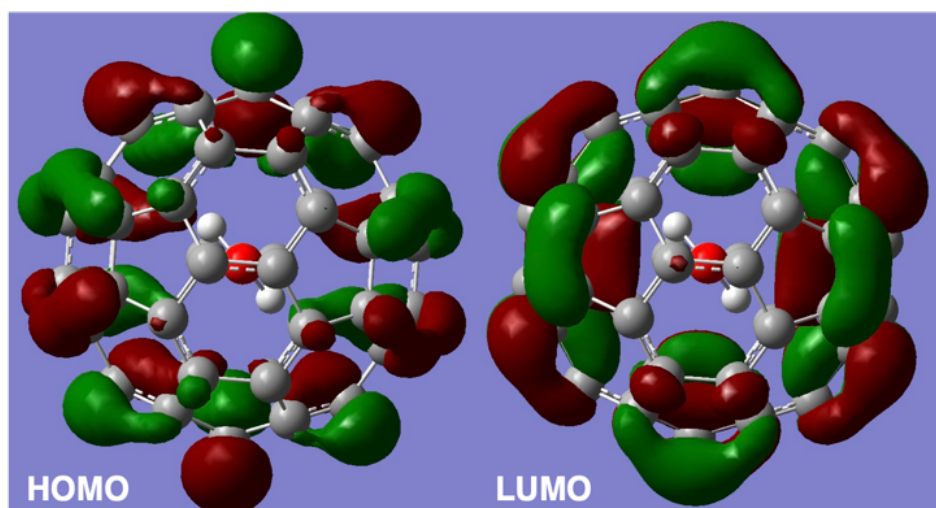

**Supplementary Fig. 20.** HOMO and LUMO of  $\text{CH}_2\text{O}@C_{60}$  66 iso. (for  $\text{CH}_2\text{O}@C_{60}$  56 iso see main paper)

#### 4.2.3 Translational modes of $\text{CH}_2\text{O}@C_{60}$ .

**Supplementary Table 10.** Calculated translational modes of  $\text{CH}_2\text{O}$  in  $\text{CH}_2\text{O}@C_{60}$  (B3LYP-D3/cc-pVTZ)

|         |  | $\text{CH}_2\text{O}@C_{60}$ 56 iso |              | $\text{CH}_2\text{O}@C_{60}$ 66 iso |              |
|---------|--|-------------------------------------|--------------|-------------------------------------|--------------|
|         |  | E/cm <sup>-1</sup>                  | IR intensity | E/cm <sup>-1</sup>                  | IR intensity |
| Trans 1 |  | 175.3                               | 0.03         | 174.5                               | 0.03         |
| Trans 2 |  | 202.52                              | 0.05         | 202.1                               | 0.03         |
| Trans 3 |  | 233.04                              | 0.12         | 233.6                               | 0.12         |

#### 4.2.4 Calculation of excited state energies.

Using single point TD-DFT calculations for singlet states at ground state geometries using B3LYP-D3/cc-pVTZ with superfine integration grid.

For CH<sub>2</sub>O@C<sub>60</sub> 56 iso the 1<sup>st</sup> excited state energy E(TD-HF/TD-KS) = -2401.61773452 Ha. Ground state energy is -2401.69391 Ha so excitation energy is 0.075656 Ha = 2.0587 eV which corresponds to absorption at 602.24 nm.

For CH<sub>2</sub>O@C<sub>60</sub> 66 iso the 1<sup>st</sup> excited state energy E(TD-HF/TD-KS) = -2401.61754357 Ha. Ground state energy is -2401.69336 Ha so excitation energy is 0.07582 Ha = 2.0631 eV which corresponds to absorption at 600.97 nm.

For C<sub>60</sub> 1<sup>st</sup> excited state energy E(TD-HF/TD-KS) = -2287.05073288 Ha. Ground state energy = -2287.127262 Ha so excitation energy is 0.07653 Ha = 2.0825 eV which corresponds to absorption at 595.37 nm. Thus CH<sub>2</sub>O@C<sub>60</sub> 56 iso excitation energy decreases by 23.8 meV corresponding to a 6.9 nm change in absorption wavelength. For CH<sub>2</sub>O@C<sub>60</sub> 66 iso excitation energy decreases by 19.4 meV corresponding to a 3.6 nm change in absorption wavelength. The significant difference is probably related to proximity of the carbonyl oxygen to a formal single bond in CH<sub>2</sub>O@C<sub>60</sub> 56 iso, and formal double bond in CH<sub>2</sub>O@C<sub>60</sub> 66 iso.

In practice fullerenes have many very close excited states – the 10 lowest from CH<sub>2</sub>O@C<sub>60</sub> and C<sub>60</sub> are given in the table below.

**Supplementary Table 11.** Singlet excited state energies for CH<sub>2</sub>O@C<sub>60</sub> and C<sub>60</sub>.

|       | CH <sub>2</sub> O@C <sub>60</sub> 56 iso |        | CH <sub>2</sub> O@C <sub>60</sub> 66 iso |        | C <sub>60</sub>           |        |
|-------|------------------------------------------|--------|------------------------------------------|--------|---------------------------|--------|
| State | Excitation<br>energy/ eV                 | l / nm | Excitation<br>energy / eV                | l / nm | Excitation<br>energy / eV | l / nm |
| 1     | 2.0587                                   | 602.24 | 2.0631                                   | 600.97 | 2.0825                    | 595.37 |
| 2     | 2.0615                                   | 601.43 | 2.0652                                   | 600.36 | 2.0825                    | 595.36 |
| 3     | 2.0731                                   | 598.05 | 2.0692                                   | 599.19 | 2.0825                    | 595.35 |
| 4     | 2.0763                                   | 597.13 | 2.0735                                   | 597.93 | 2.0826                    | 595.34 |
| 5     | 2.0785                                   | 596.52 | 2.0774                                   | 596.83 | 2.0952                    | 591.75 |
| 6     | 2.085                                    | 594.66 | 2.0824                                   | 595.39 | 2.0953                    | 591.74 |
| 7     | 2.0871                                   | 594.04 | 2.0888                                   | 593.58 | 2.0953                    | 591.72 |
| 8     | 2.0874                                   | 593.96 | 2.0931                                   | 592.35 | 2.096                     | 591.53 |
| 9     | 2.1043                                   | 589.19 | 2.0937                                   | 592.18 | 2.096                     | 591.52 |
| 10    | 2.1127                                   | 586.85 | 2.1202                                   | 584.78 | 2.0961                    | 591.51 |



#### 4.2.5 NMR calculations on CH<sub>2</sub>O@C<sub>60</sub> and C<sub>60</sub>.

Isotropic <sup>13</sup>C NMR shifts of CH<sub>2</sub>O@C<sub>60</sub> and C<sub>60</sub> were calculated using the GAIO method using B3LYP with cc-pVTZ basis set and superfine integration grid.

**Supplementary Table 12.** Calculated <sup>13</sup>C NMR shifts for C<sub>60</sub> and CH<sub>2</sub>O@C<sub>60</sub>.

| C60    | CH <sub>2</sub> O@C <sub>60</sub><br>56 iso | CH <sub>2</sub> O@C <sub>60</sub><br>66 iso | C <sub>60</sub> <sup>a</sup> | C <sub>60</sub> <sup>b</sup> | CH <sub>2</sub> O@C <sub>60</sub> <sup>c</sup> |
|--------|---------------------------------------------|---------------------------------------------|------------------------------|------------------------------|------------------------------------------------|
| 33.318 | 29.535                                      | 27.993                                      | 31.890                       | 31.465                       | 34.102                                         |
| 33.354 | 31.875                                      | 28.828                                      | 33.087                       | 32.165                       | 34.246                                         |
| 33.329 | 32.742                                      | 31.486                                      | 33.794                       | 33.613                       | 33.690                                         |
| 33.316 | 30.114                                      | 31.375                                      | 32.373                       | 32.637                       | 33.498                                         |
| 33.350 | 29.822                                      | 30.853                                      | 32.027                       | 32.555                       | 34.070                                         |
| 33.365 | 28.585                                      | 28.923                                      | 31.997                       | 32.168                       | 33.297                                         |
| 33.316 | 28.330                                      | 28.069                                      | 31.865                       | 31.473                       | 33.153                                         |
| 33.366 | 32.834                                      | 30.885                                      | 33.143                       | 32.566                       | 33.082                                         |
| 33.361 | 32.364                                      | 31.450                                      | 33.095                       | 32.684                       | 33.249                                         |
| 33.354 | 29.438                                      | 30.330                                      | 32.546                       | 32.505                       | 33.303                                         |
| 33.316 | 34.969                                      | 33.725                                      | 34.267                       | 33.900                       | 33.550                                         |
| 33.301 | 34.515                                      | 33.336                                      | 33.954                       | 33.372                       | 33.921                                         |
| 33.363 | 32.148                                      | 33.057                                      | 33.671                       | 33.683                       | 33.474                                         |
| 33.323 | 32.927                                      | 33.473                                      | 32.652                       | 33.434                       | 33.817                                         |
| 33.316 | 33.199                                      | 33.158                                      | 32.925                       | 33.166                       | 33.341                                         |
| 33.370 | 32.103                                      | 32.146                                      | 33.192                       | 33.359                       | 34.114                                         |
| 33.361 | 32.782                                      | 33.001                                      | 33.835                       | 33.880                       | 33.898                                         |
| 33.305 | 30.496                                      | 31.895                                      | 33.372                       | 33.488                       | 33.144                                         |
| 33.353 | 29.738                                      | 31.613                                      | 32.679                       | 33.618                       | 33.292                                         |
| 33.276 | 31.913                                      | 33.316                                      | 31.731                       | 33.491                       | 34.162                                         |
| 33.292 | 32.808                                      | 33.966                                      | 32.547                       | 33.898                       | 34.244                                         |
| 33.355 | 33.706                                      | 32.518                                      | 33.465                       | 32.486                       | 34.095                                         |
| 33.355 | 32.425                                      | 32.289                                      | 32.417                       | 32.450                       | 33.971                                         |
| 33.355 | 32.707                                      | 33.816                                      | 33.265                       | 33.893                       | 32.317                                         |
| 33.355 | 33.036                                      | 33.414                                      | 33.224                       | 33.394                       | 32.559                                         |
| 33.333 | 33.080                                      | 34.341                                      | 32.779                       | 33.712                       | 33.253                                         |
| 33.326 | 34.949                                      | 34.986                                      | 34.266                       | 34.223                       | 33.412                                         |
| 33.353 | 33.112                                      | 33.283                                      | 32.501                       | 32.555                       | 33.437                                         |
| 33.305 | 32.803                                      | 34.392                                      | 31.983                       | 33.564                       | 33.255                                         |
| 33.361 | 34.911                                      | 34.997                                      | 34.115                       | 34.216                       | 32.561                                         |
| 33.370 | 33.745                                      | 33.231                                      | 33.292                       | 32.529                       | 32.415                                         |
| 33.292 | 32.989                                      | 34.163                                      | 33.200                       | 33.770                       | 31.458                                         |
| 33.276 | 32.922                                      | 34.559                                      | 33.608                       | 34.147                       | 31.115                                         |
| 33.301 | 33.696                                      | 32.521                                      | 33.972                       | 32.474                       | 32.814                                         |
| 33.301 | 34.554                                      | 33.174                                      | 33.968                       | 32.510                       | 33.773                                         |
| 33.331 | 32.488                                      | 33.962                                      | 32.712                       | 33.859                       | 30.765                                         |
| 33.363 | 33.482                                      | 34.289                                      | 32.760                       | 33.673                       | 31.844                                         |
| 33.350 | 32.284                                      | 31.538                                      | 32.319                       | 31.392                       | 31.976                                         |

|              |          |          |          |          |          |          |
|--------------|----------|----------|----------|----------|----------|----------|
|              | 33.365   | 32.211   | 31.886   | 32.281   | 31.449   | 33.351   |
|              | 33.354   | 32.864   | 33.010   | 32.299   | 32.749   | 33.407   |
|              | 33.361   | 32.237   | 33.069   | 32.209   | 32.850   | 33.406   |
|              | 33.316   | 32.099   | 31.617   | 32.160   | 31.837   | 33.279   |
|              | 33.316   | 31.604   | 33.028   | 31.284   | 32.807   | 31.438   |
|              | 33.331   | 33.895   | 34.092   | 33.769   | 33.726   | 33.451   |
|              | 33.332   | 33.962   | 34.492   | 33.820   | 34.092   | 33.137   |
|              | 33.341   | 32.122   | 31.760   | 33.669   | 33.437   | 33.126   |
|              | 33.317   | 29.950   | 30.191   | 32.342   | 32.456   | 33.696   |
|              | 33.301   | 33.677   | 32.134   | 33.975   | 33.327   | 33.322   |
|              | 33.326   | 33.225   | 33.011   | 33.786   | 33.874   | 33.559   |
|              | 33.333   | 32.734   | 33.108   | 33.261   | 33.720   | 33.563   |
|              | 33.366   | 33.723   | 31.529   | 33.386   | 31.408   | 33.790   |
|              | 33.318   | 32.211   | 31.618   | 32.214   | 31.824   | 31.467   |
|              | 33.354   | 33.738   | 31.918   | 33.224   | 31.472   | 31.906   |
|              | 33.316   | 33.223   | 32.244   | 33.756   | 32.419   | 32.413   |
|              | 33.316   | 32.896   | 33.171   | 33.326   | 33.146   | 31.932   |
|              | 33.329   | 34.912   | 33.226   | 34.045   | 32.528   | 31.421   |
|              | 33.323   | 33.049   | 33.487   | 33.217   | 33.421   | 29.885   |
|              | 33.332   | 32.515   | 33.315   | 32.709   | 33.429   | 29.559   |
|              | 33.317   | 31.673   | 32.942   | 31.292   | 32.707   | 30.151   |
|              | 33.341   | 33.527   | 34.361   | 32.737   | 33.499   | 30.041   |
| Average      | 33.3331  | 32.5362  | 32.5592  | 32.9875  | 33.0023  | 32.8827  |
| $\delta C^d$ | 151.2605 | 152.0574 | 152.0344 | 151.6061 | 151.5913 | 151.7109 |

a  $C_{60}$  at geometry of  $CH_2O@C_{60}$  56 iso. b  $C_{60}$  at geometry of  $CH_2O@C_{60}$  56 iso. c  $CH_2O@C_{60}$  where  $C_{60}$  is fixed at the empty geometry. d Shift corrected to  $\delta$  scale using a calculated average isotropic  $^{13}C$  chemical shift of  $Me_4Si$  carbons of 184.5936.

**Supplementary Table 13.** Summary of  $^{13}C$  calculated Chemical shift changes on  $CH_2O$  incorporation.

|                                            | $\delta C$ / ppm | change from $C_{60}$ / $\delta$ ppm |
|--------------------------------------------|------------------|-------------------------------------|
| $C_{60}$                                   | 151.2605         | 0                                   |
| $CH_2O@C_{60}$ iso 56                      | 152.0574         | 0.797                               |
| $CH_2O@C_{60}$ iso 66                      | 152.0344         | 0.774                               |
| $C_{60}$ at $CH_2O@C_{60}$ 56 iso geometry | 151.6061         | 0.346                               |
| $C_{60}$ at $CH_2O@C_{60}$ 66 iso geometry | 151.5913         | 0.331                               |
| $CH_2O@C_{60}$ at empty $C_{60}$ geometry  | 151.7109         | 0.450                               |

## 5. NMR studies on CH<sub>2</sub>O@C<sub>60</sub>

NMR experiments were performed at the following magnetic fields: (1) at 16.45 T, carried out using a Bruker Ascend 700 NB magnet fitted with a Bruker AVANCE NEO console and Bruker TCI prodigy 5 mm liquids cryoprobe; (2) at 9.4 T using an Oxford AS400 magnet fitted with a Bruker AVANCE NEO console and a Bruker BBO 5mm liquids probe; (3) at 14 T using a Bruker AS 600 WB magnet fitted with a Bruker AVANCE NEO console and a Bruker TBI 5mm liquids probe.

<sup>1</sup>H and <sup>13</sup>C NMR spectra were referenced to the solvent chemical shifts (1,2-dichlorobenzene-*d*<sub>4</sub>), <sup>1</sup>H = 6.93 ppm and <sup>13</sup>C = 127.19 ppm. The confidence limits of the absolute chemical shift are dominated by the chemical shift of reference solvents, reported to 2 decimal places.

An approx. 23 mM solution of CH<sub>2</sub>O@C<sub>60</sub> in 1,2-dichlorobenzene-*d*<sub>4</sub> (ODCB-*d*<sub>4</sub>, Sigma-Aldrich), was prepared by dissolving 14 mg of powdered CH<sub>2</sub>O@C<sub>60</sub> (86.7 % filling) in 0.8 mL of the solvent. The solution was then filtered and degassed by bubbling nitrogen gas through the solution for 10 min.

### 5.1 <sup>1</sup>H spin-lattice relaxation of <sup>13</sup>CH<sub>2</sub>O@C<sub>60</sub>

<sup>1</sup>H T<sub>1</sub> relaxation measurements of the <sup>13</sup>CH<sub>2</sub>O@C<sub>60</sub> isotopologue, shown in Supplementary Fig. 21, were acquired on the natural abundance CH<sub>2</sub>O@C<sub>60</sub> sample from the <sup>13</sup>CH<sub>2</sub>O@C<sub>60</sub> <sup>1</sup>H satellites. The <sup>1</sup>H T<sub>1</sub> of the <sup>13</sup>CH<sub>2</sub>O@C<sub>60</sub> satellites is only slightly shorter than the <sup>1</sup>H T<sub>1</sub> of the <sup>12</sup>CH<sub>2</sub>O@C<sub>60</sub>, 27.9 ± 0.7 & 28.0 ± 0.8 s (Fig. 21) and 30.65 ± 0.04 s (Fig. 4d in main manuscript) respectively. The slightly shorter <sup>1</sup>H T<sub>1</sub> value for the <sup>13</sup>CH<sub>2</sub>O@C<sub>60</sub> isotopologue is attributed to contributions from <sup>1</sup>H-<sup>13</sup>C dipolar relaxation, which are not present for the <sup>12</sup>CH<sub>2</sub>O@C<sub>60</sub> isotopologue.

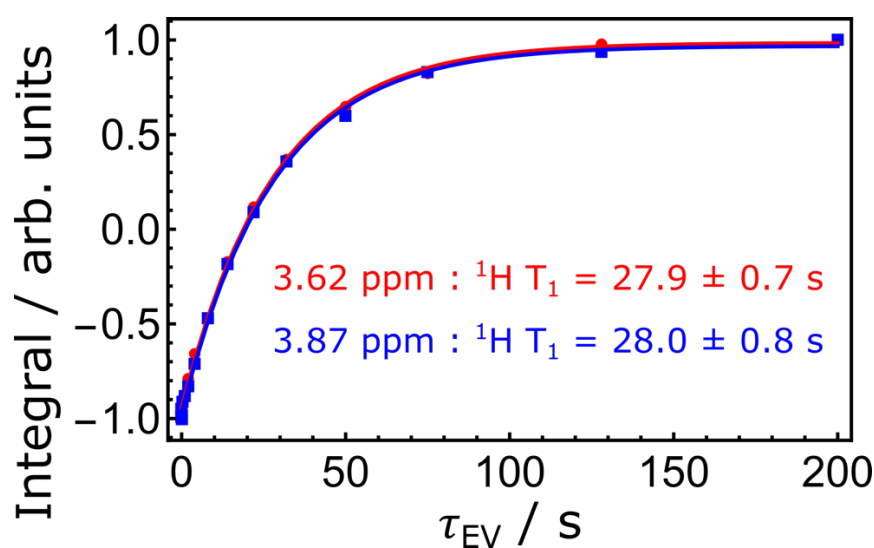

**Figure 21 :**  $^1\text{H}$   $T_1$  relaxation curves (Inversion Recovery) of  $^{13}\text{CH}_2\text{O}@\text{C}_{60}$   $^1\text{H}$  satellites at 3.62 ppm (red) and 3.87 ppm (blue), approx. 23 mM solution in degassed 1,2-dichlorobenzene- $d_4$  (ODCB- $d_4$ ) at a field of 16.45 T and 298 K, acquired with 16 transients.  $^1\text{H}$   $T_1$  of  $^{13}\text{CH}_2\text{O}@\text{C}_{60}$  satellites: at 3.62 ppm =  $27.9 \pm 0.7$  s and at 3.87 ppm =  $28.0 \pm 0.8$  s.

## 5.2 $^{13}\text{C}$ spin-lattice relaxation of $\text{CH}_2\text{O}@\text{C}_{60}$

The  $^{13}\text{C}$   $T_1$  of  $\text{CH}_2\text{O}@\text{C}_{60}$  was measured using inversion recovery, shown in Fig 22, to give  $17.42 \pm 0.06$  s.  $^{13}\text{C}$   $T_1$  value is consistent with other measurements of empty and filled  $\text{C}_{60}$  molecules under equivalent conditions (same solvent and magnetic field).

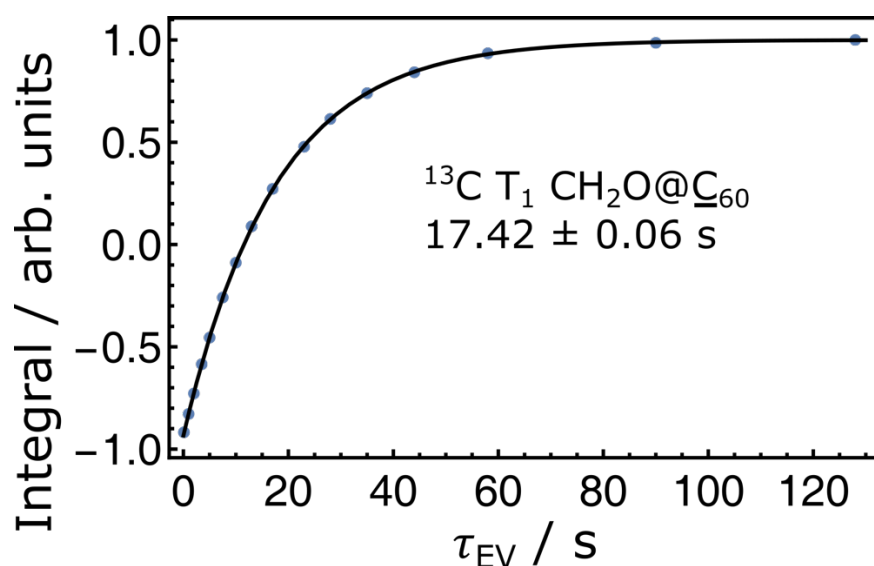

**Figure 22:**  $^{13}\text{C}$   $T_1$  relaxation curve (Inversion Recovery) of  $\text{CH}_2\text{O}@\text{C}_{60}$  (86.7 % filling), approx. 23 mM solution in degassed 1,2-dichlorobenzene- $d_4$  (ODCB- $d_4$ ) at a field of 16.45 T and 298 K.  $^{13}\text{C}$   $T_1$  of  $\text{CH}_2\text{O}@\text{C}_{60}$  =  $17.42 \pm 0.06$  s, acquired with 8 transients.

### 5.3 $^1\text{H}$ spin-lattice relaxation of $\text{CH}_2\text{O}@2$ and monomeric $\text{CH}_2\text{O}$

Solution state  $^1\text{H}$   $T_1$  relaxation times were measured by inversion recovery in the open-cage intermediate  $\text{CH}_2\text{O}@2$  and for monomeric  $\text{CH}_2\text{O}$  in solution. A 33 mM solution of  $\text{CH}_2\text{O}@2$  was prepared in  $\text{ODCB-}d_4$  (1,2-dichlorobenzene- $d_4$ ) and degassed by bubbling with nitrogen gas for 10 minutes. The  $^1\text{H}$   $T_1$  was found to be  $2.31 \pm 0.03$  s (Fig. 23). As free  $\text{CH}_2\text{O}$  rapidly polymerises when dissolved in ODCB, tetrahydrofuran (THF) was used as solvent instead. A 100 mM solution of  $\text{CH}_2\text{O}$  was prepared in 10% THF/90% THF- $d_8$  and degassed as above. The  $^1\text{H}$   $T_1$  was found to be  $30.8 \pm 0.8$  s (Fig. 24).

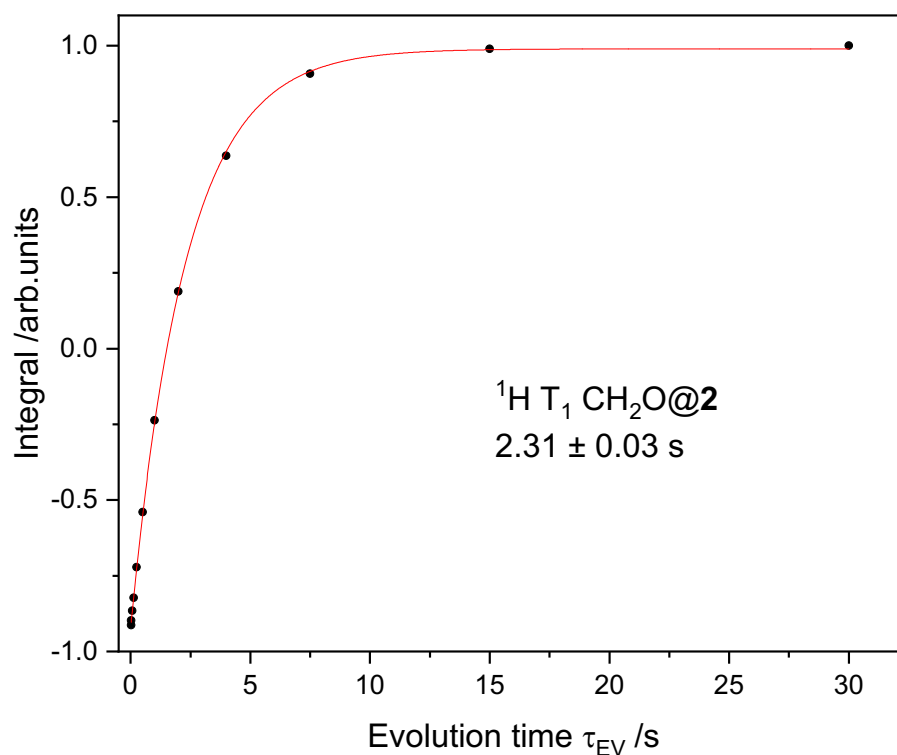

**Figure 23:** Inversion recovery with experimental data (black circles) and fitted curve (red line) for the spin-lattice relaxation time constant of  $\text{CH}_2\text{O}$   $^1\text{H}$  nuclei in  $\text{CH}_2\text{O}@2$ , 33mM solution in  $\text{ODCB-}d_4$ . Acquired at 16.45 T and 298 K .

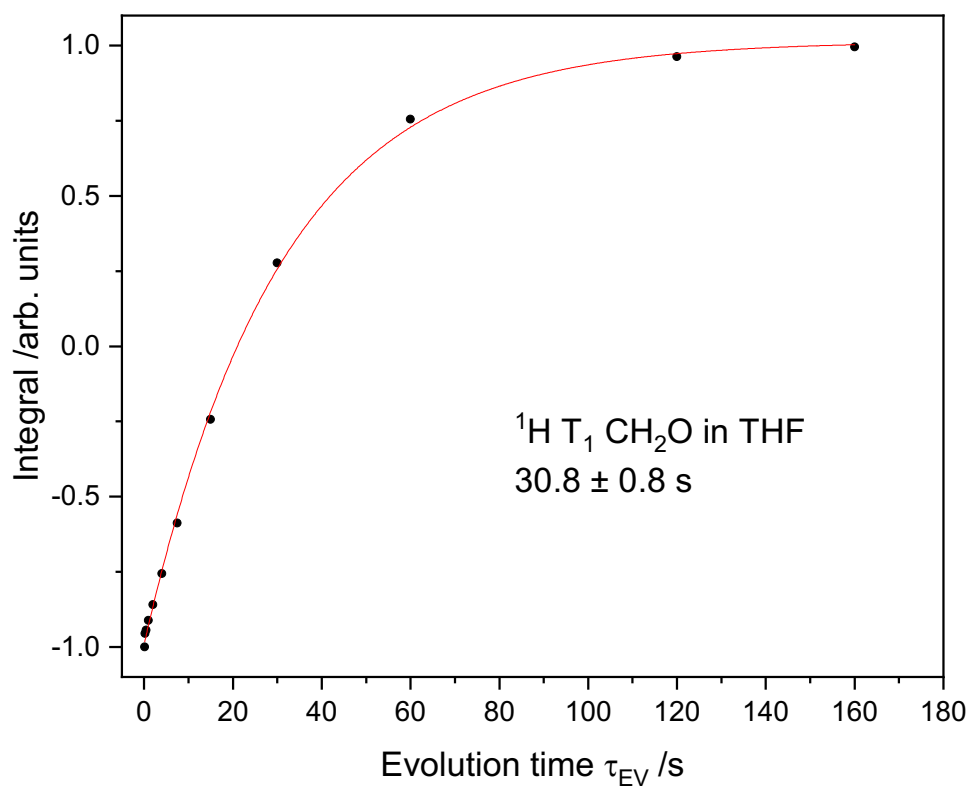

**Figure 24:** Inversion recovery with experimental data (black circles) and fitted curve (red line) for the  $^1\text{H}$  spin-lattice relaxation time in free  $\text{CH}_2\text{O}$ , 100 mM solution in 10% THF/90% THF- $d_8$ . Acquired at 16.45 T and 298 K.

## 6. THz and IR studies on CH<sub>2</sub>O@C<sub>60</sub>.

Absorption coefficient was calculated as  $\alpha = -d^{-1} \ln(I_s/I_r)$  where  $I_s$  and  $I_r$  are the light intensities at the detector transmitted by the sample and by a 3 mm diameter reference hole. For the translational modes between 150 and 250 cm<sup>-1</sup>, shown in Fig. 25, the baseline was subtracted. The oscillations seen in the spectrum are due to the interference of IR radiation between the two sample pellet surfaces.

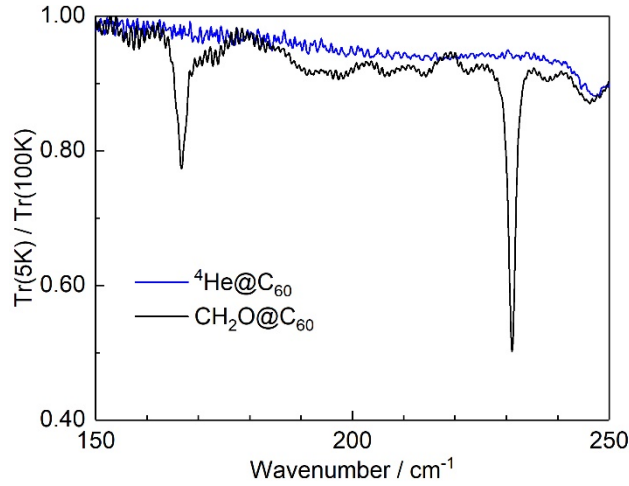

**Supplementary Fig. 25.** Comparison of transmission spectra of CH<sub>2</sub>O@C<sub>60</sub> (black line) and <sup>4</sup>He@C<sub>60</sub> (blue line). Shown is the ratio of transmission spectrum at 5K to the transmission spectrum at 100K. Absorption lines at 167 and 231 cm<sup>-1</sup> are present in the CH<sub>2</sub>O sample but missing in the <sup>4</sup>He sample.

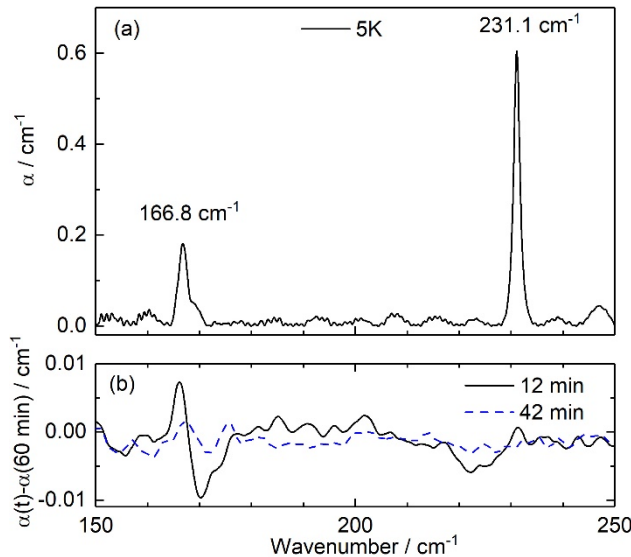

**Supplementary Fig. 26** (a) Absorption spectrum of CH<sub>2</sub>O@C<sub>60</sub> at 5K and (b) ortho-para conversion of CH<sub>2</sub>O@C<sub>60</sub> at 5K. Shown is the difference where the spectrum measured at 60 min after the completion of the temperature jump from 20 K to 5 K, subtracted from spectra measured at 12 min and 42 min after the completion of the temperature jump. The positive part in

the difference spectrum is the ortho-CH<sub>2</sub>O signal while the negative part is para-CH<sub>2</sub>O signal. Absence of ortho-para conversion signature for the 231 cm<sup>-1</sup> translational mode in the difference spectra could be caused by the overlap of ortho and para species spectral lines for this mode.



**7. X-ray structure of CH<sub>2</sub>O@C<sub>60</sub> nickel(II) octaethylporphyrin complex.**

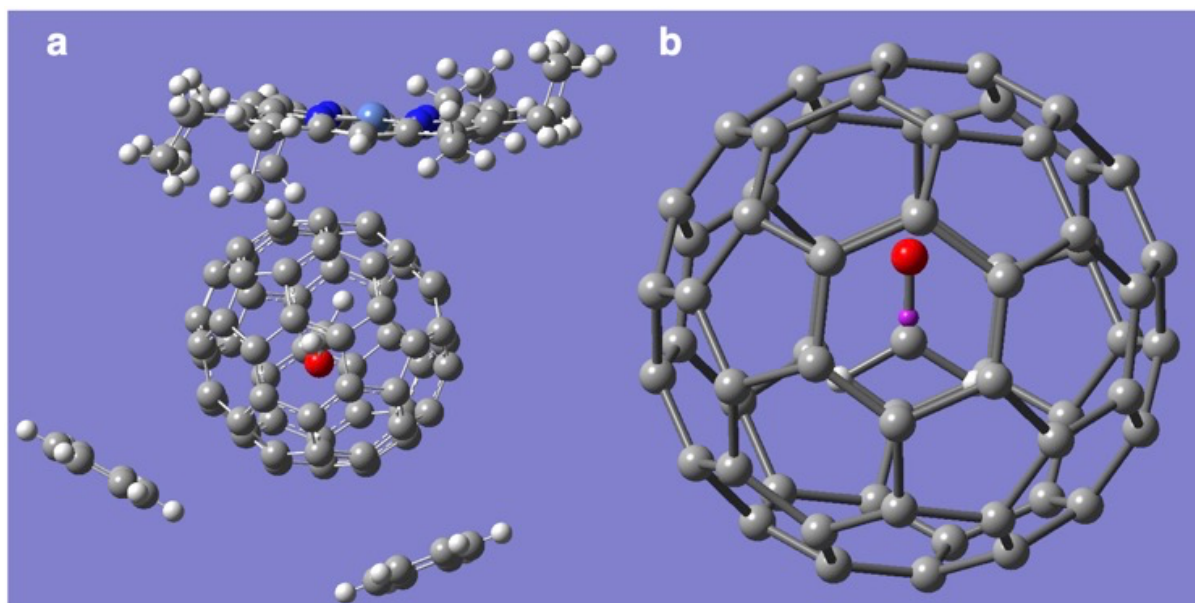

**Supplementary Fig. 27.** a. Crystal structure of the nickel(II) octaethylporphyrin/benzene solvate of CH<sub>2</sub>O@C<sub>60</sub> with CH<sub>2</sub>O position minimised using DFT (B3LYP-D3/6-31(d)) all other atoms being frozen. b. Expansion of cage showing its centroid as purple sphere. Centroid–CH<sub>2</sub> and centroid–O distances are 0.34 and 0.86Å respectively.

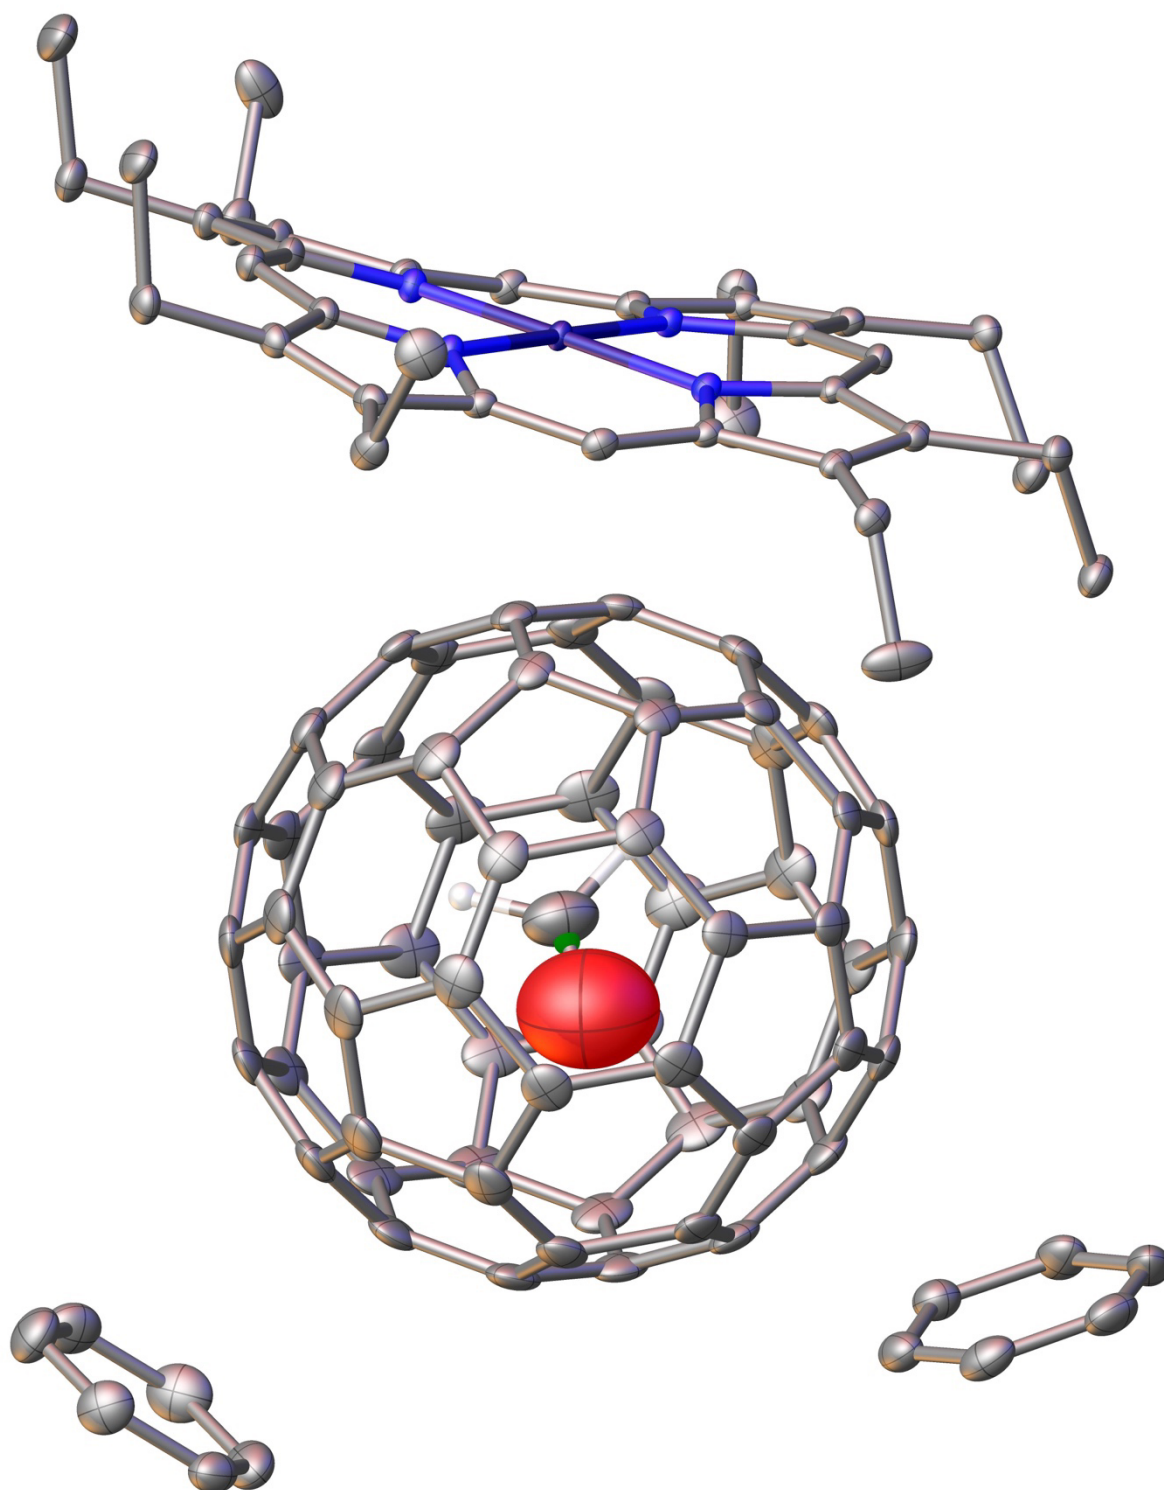

**Supplementary Fig. 28.** Single crystal x-ray structure of the nickel(II) octaethylporphyrin/benzene solvate of CH<sub>2</sub>O@C<sub>60</sub> at 100 K with CCDC deposition number 2126579 (R1=0.050). Thermal ellipsoids drawn at 50% probability, hydrogens, except on the CH<sub>2</sub>O, are omitted for clarity.

## 8. Photochemistry apparatus.

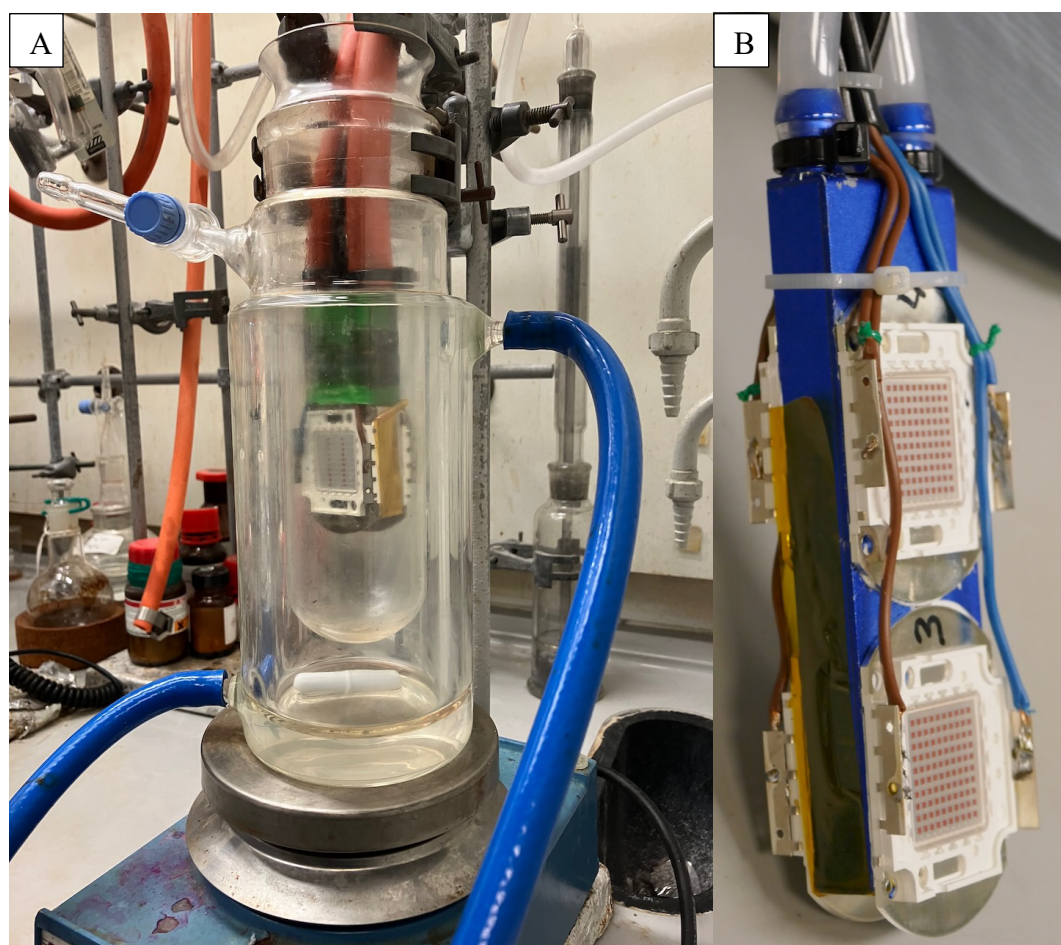

**Supplementary Fig. 29.** Custom built photochemistry apparatus used for SO extrusion reaction. A Apparatus showing outer jacket for temperature control using a circulating liquid. Middle stirred volume for reaction mixture and inner well containing LED lights (in this picture 2 x 20W). B. The 4 x 100W LED lamp used in the paper. The 100W LEDs were from Chanzon with emission range 590-995 nm (yellow) each driven by a 3A 20-24V constant current driver. The measured power consumption was typically 70W per LED chip. Three LED chips were used in the described reactions. The LEDs are mounted on a water cooled aluminium block.

## 9. References.

1. Futagoishi, T., Murata, M., Wakamiya, A. & Murata, Y. Encapsulation and Dynamic Behavior of Methanol and Formaldehyde inside Open-Cage C<sub>60</sub> Derivatives. *Angew. Chem. Int. Ed.* **56**, 2758-2762 (2017).
2. Boys, S. F. & Bernardi, F. The calculation of small molecular interactions by the differences of separate total energies. Some procedures with reduced errors. *Mol. Phys.* **19**, 553-566 (1970).
